# Supplementary material for: I2-Catalyzed diamination of acetyl-compounds for the synthesis of multi-substituted imidazoles
Source: Royal Society of Chemistry journal article supplement (doi:10.1039/c5nj00910c), 2015-01-01
Supplement: c5nj00910c1.pdf [file c5nj00910c1.pdf]

## Supporting information

### I<sub>2</sub>-Catalyzed Diamination of Acetyl-compounds to Achieve Multi-substituted Imidazoles

Jinpeng Qu,<sup>a</sup> Ping Wu,<sup>a</sup> Dong Tang,<sup>a</sup> Xu Meng,<sup>c</sup> Yongxin Chen,<sup>b</sup> Shuaibo Guo,<sup>a</sup> Baohua Chen<sup>\*a</sup>

<sup>a</sup>State Key Laboratory of Applied Organic Chemistry, Lanzhou University, Gansu Lanzhou, 730000, P. R. China, and Key Laboratory of Nonferrous Metal Chemistry and Resources Utilization of Gansu Province, Lanzhou, 730000, P. R. China

<sup>b</sup>Key Laboratory of Petroleum Resources Research, Institute of Geology and Geophysics, Lanzhou 730000, China

<sup>c</sup>State Key Laboratory of Oxo Synthesis and Selective Oxidation, Lanzhou Institute of Chemical Physics, Chinese Academy of Sciences, Lanzhou, 730000, P. R. China

E-mail: [chbh@lzu.edu.cn](mailto:chbh@lzu.edu.cn).

### Table of Contents

|                                                                        |         |
|------------------------------------------------------------------------|---------|
| 1) <sup>1</sup> H and <sup>13</sup> C NMR spectra of the products..... | S2-S20  |
| 2) Spectra data of the compounds.....                                  | S21-S23 |

# 1) $^1\text{H}$ and $^{13}\text{C}$ NMR spectra of the products

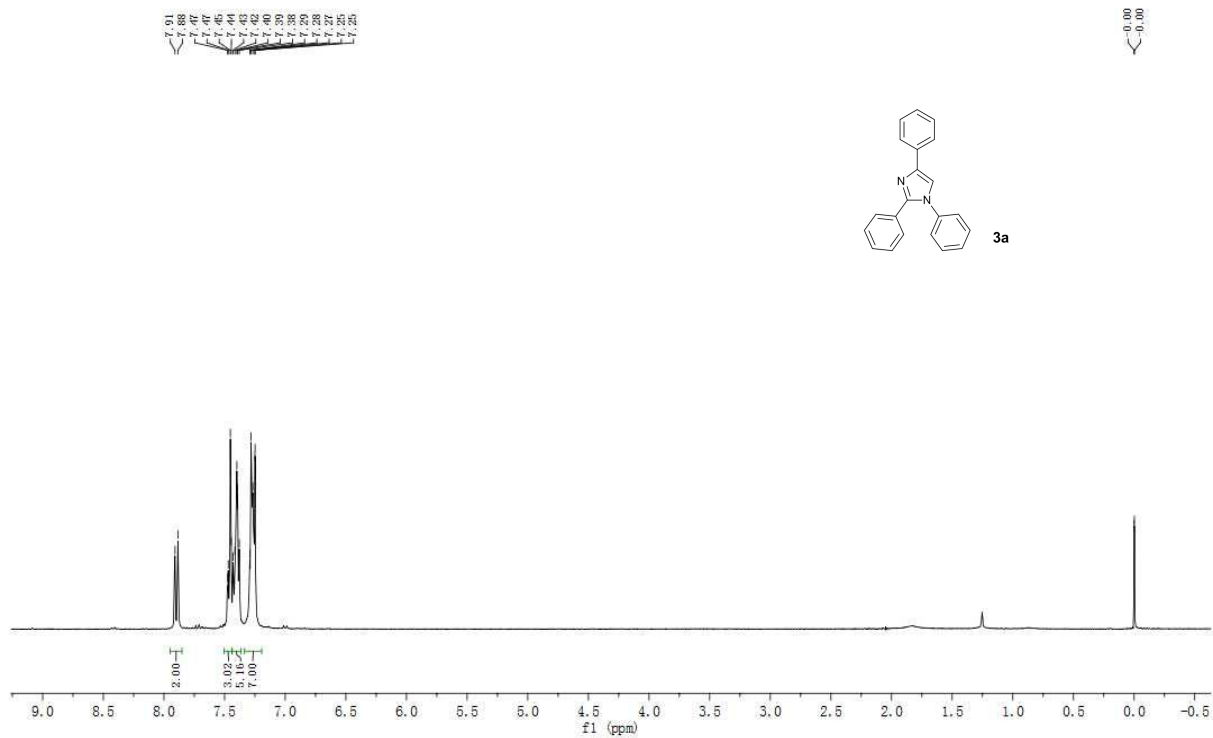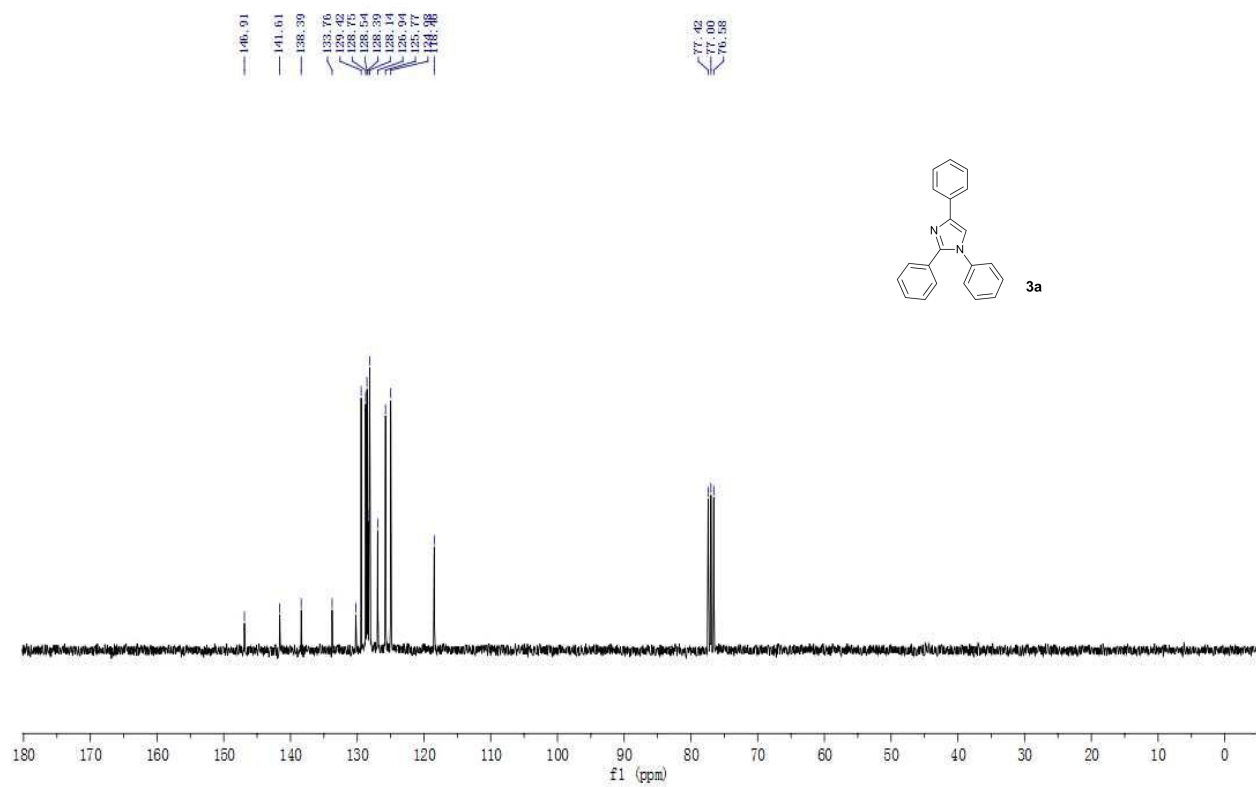

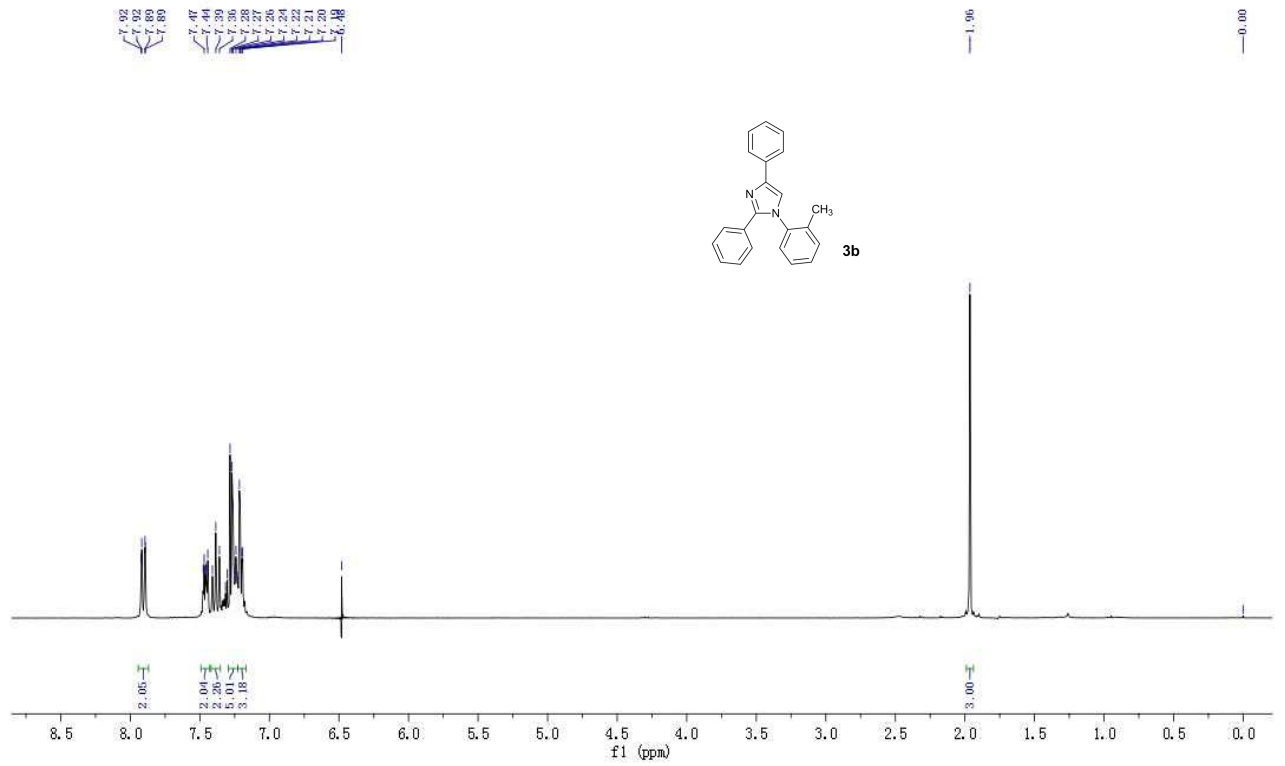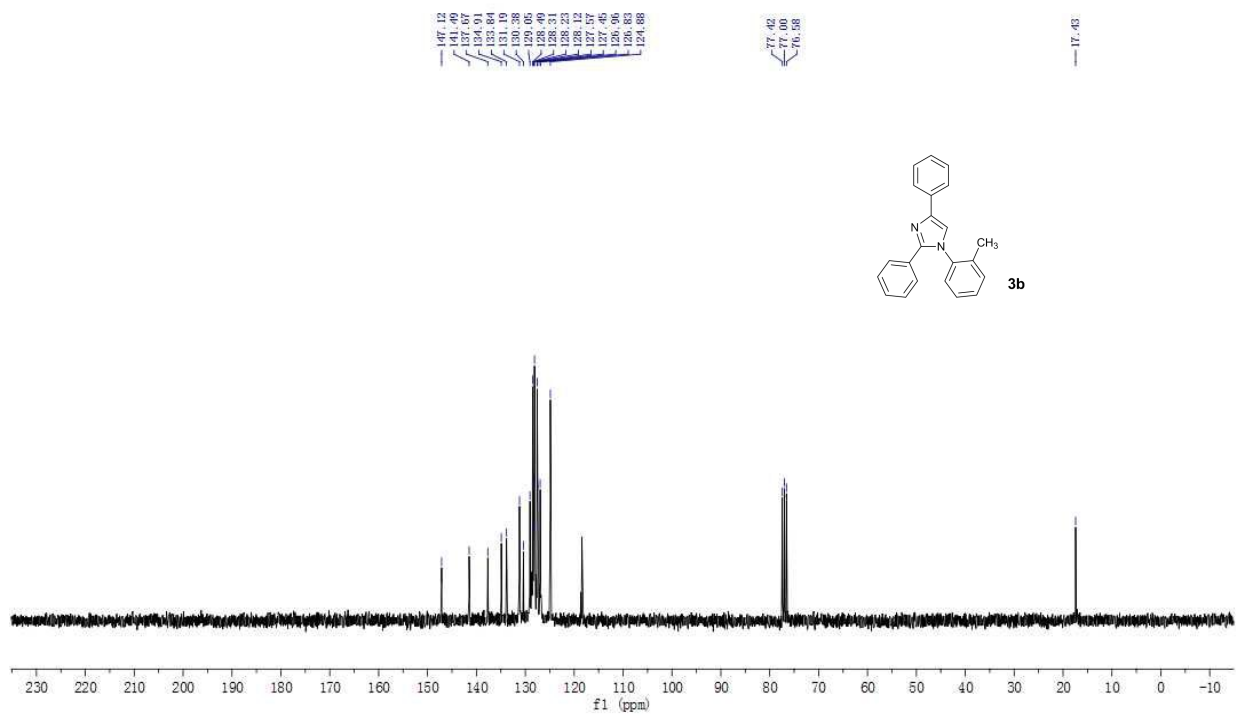

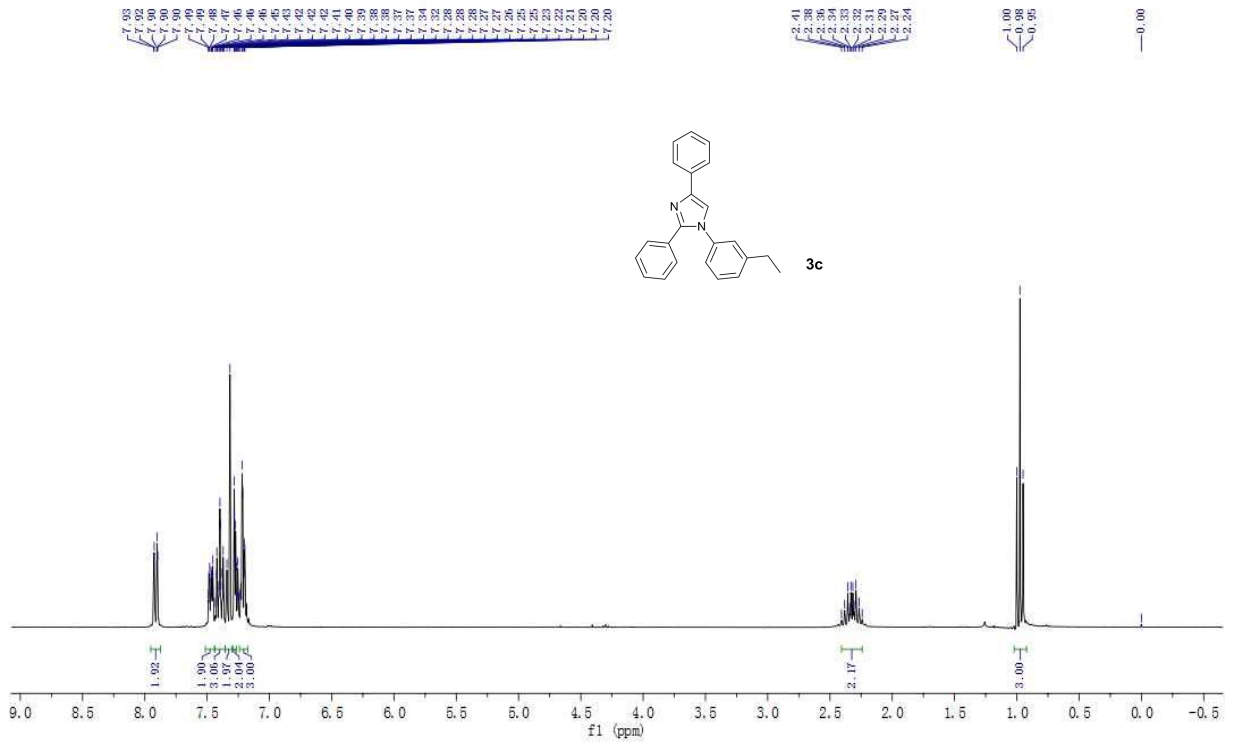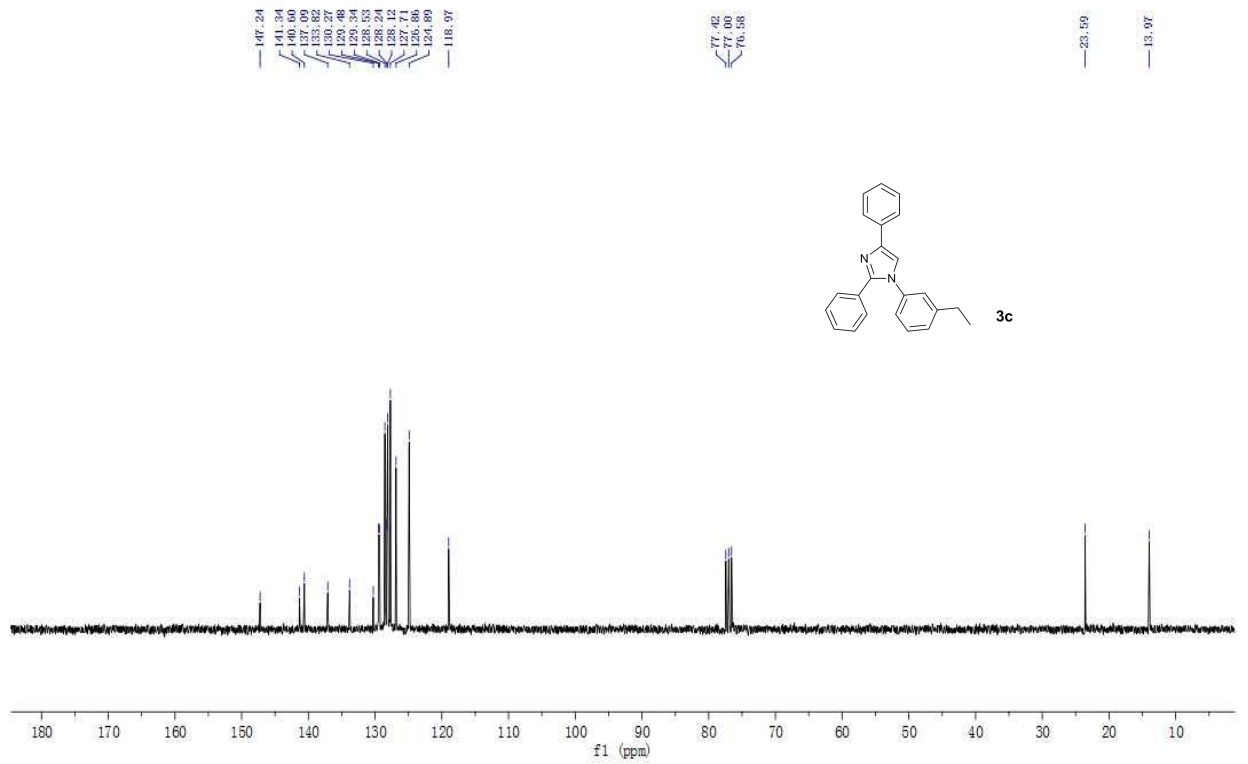

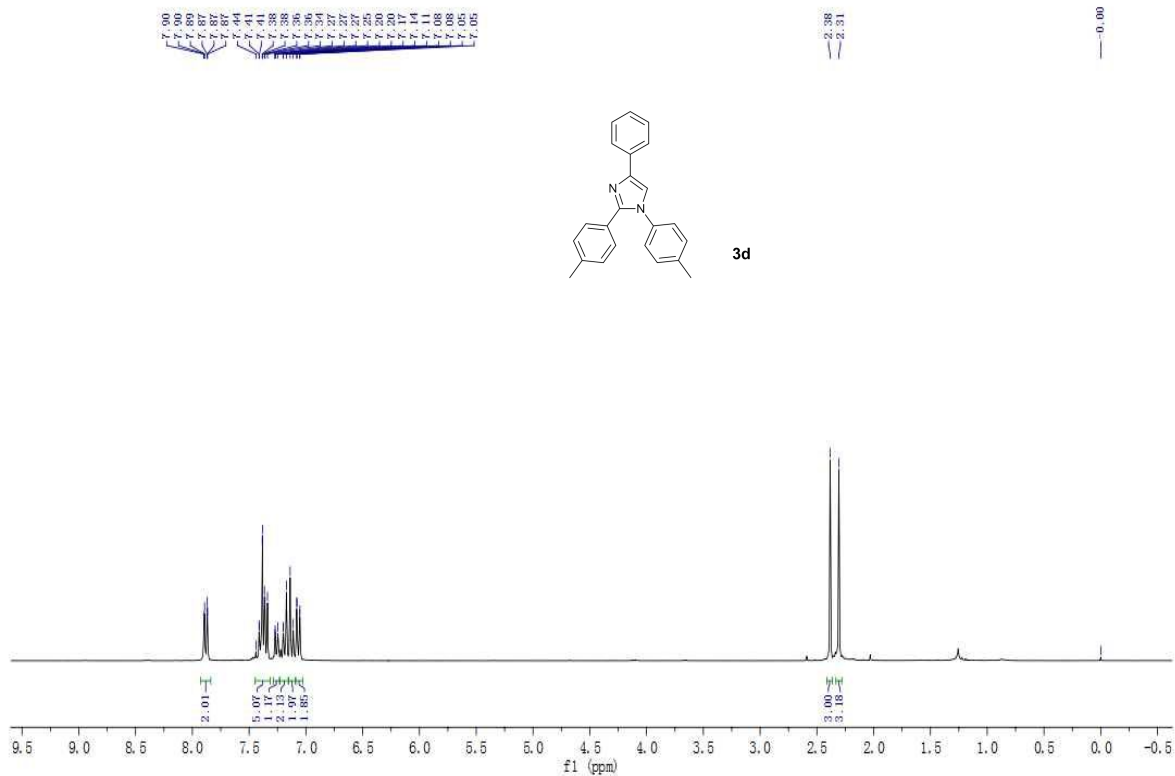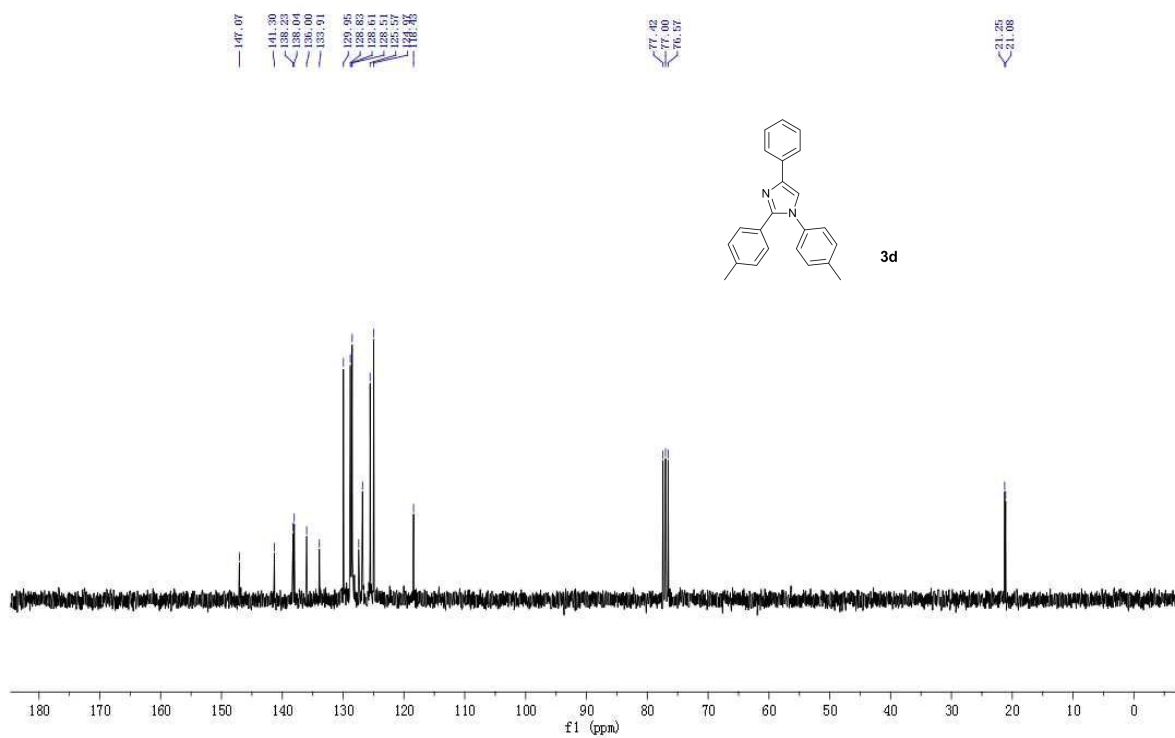

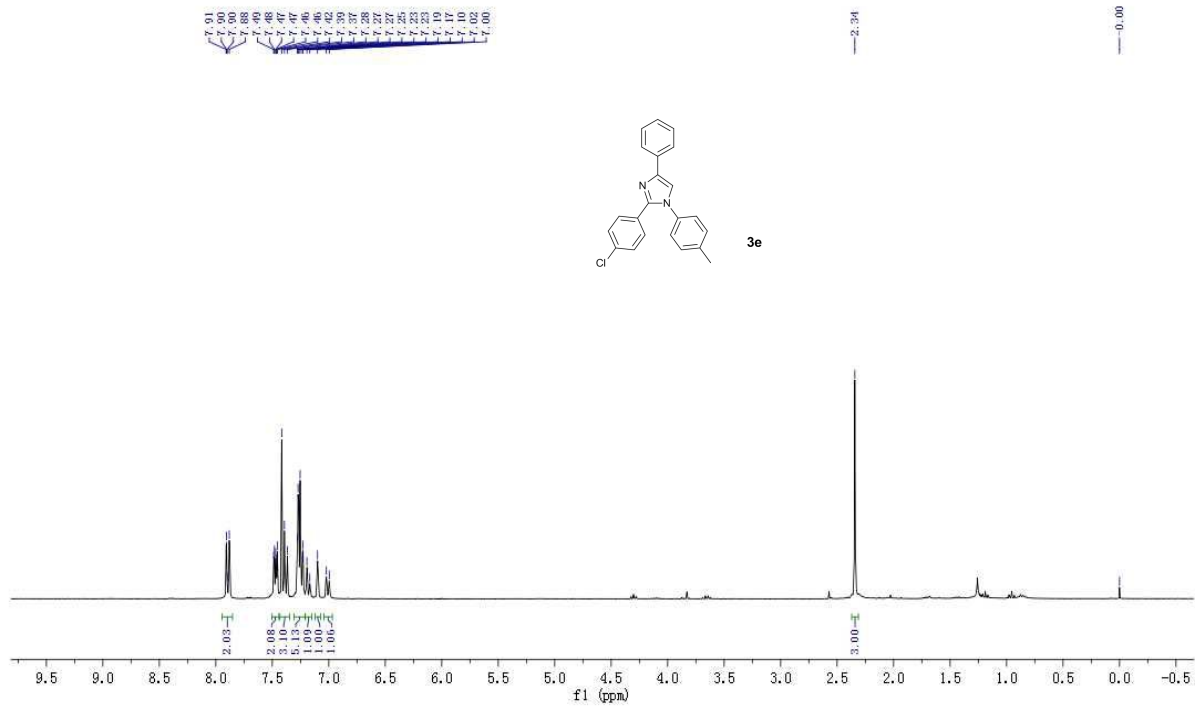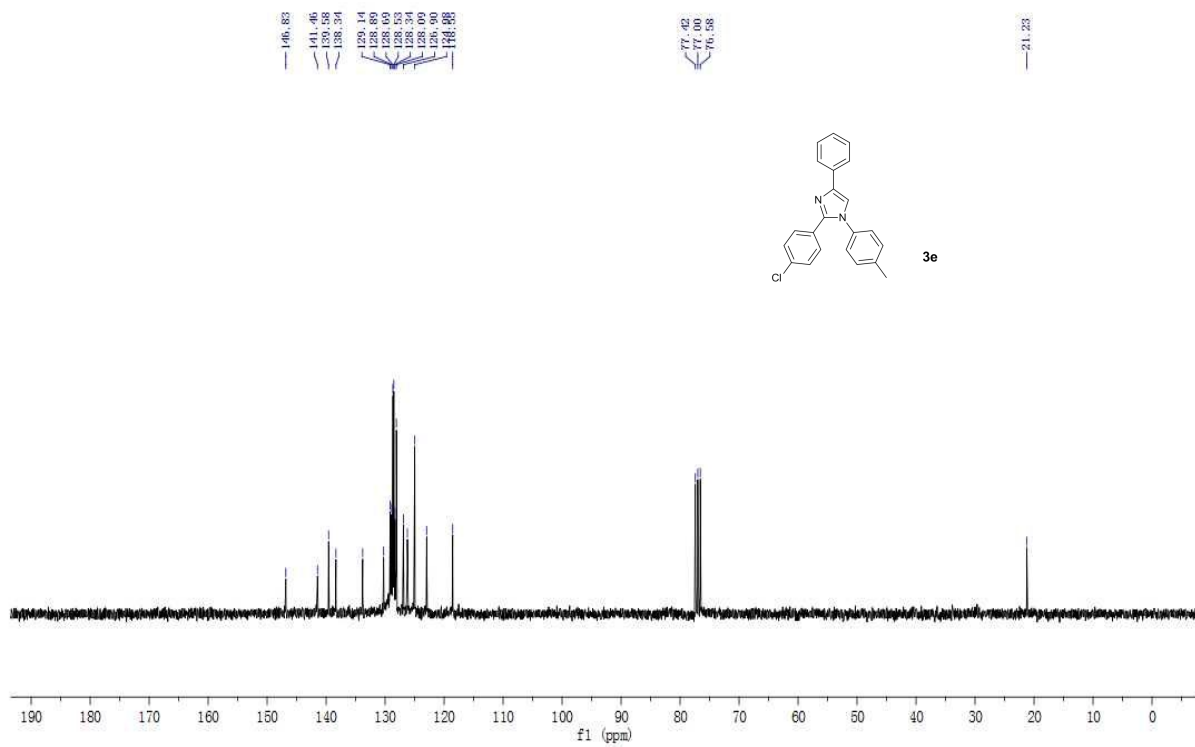

7.89  
7.88  
7.86  
7.83  
7.82  
7.81  
7.80  
7.79  
7.35  
7.34  
7.32  
7.31  
7.30  
7.28  
7.26  
7.25  
7.22  
7.15  
7.14  
7.12  
7.11

-0.00

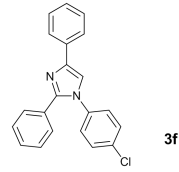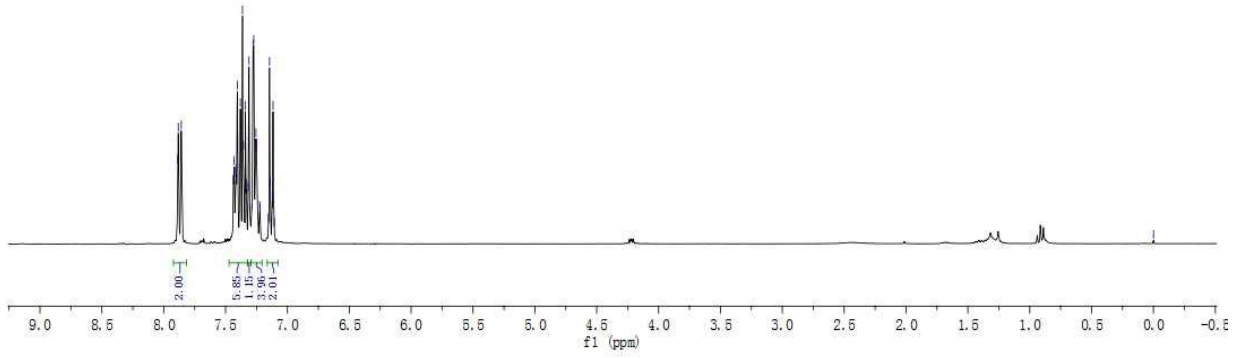

146.84  
141.80  
136.78  
133.83  
132.49  
128.71  
128.57  
128.24  
127.04  
126.89  
126.74

77.42  
77.00  
76.58

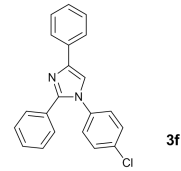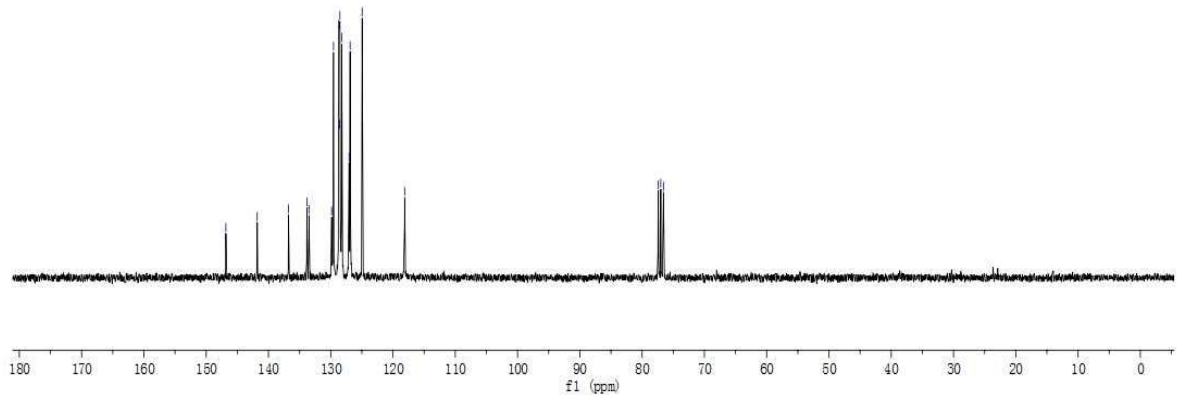

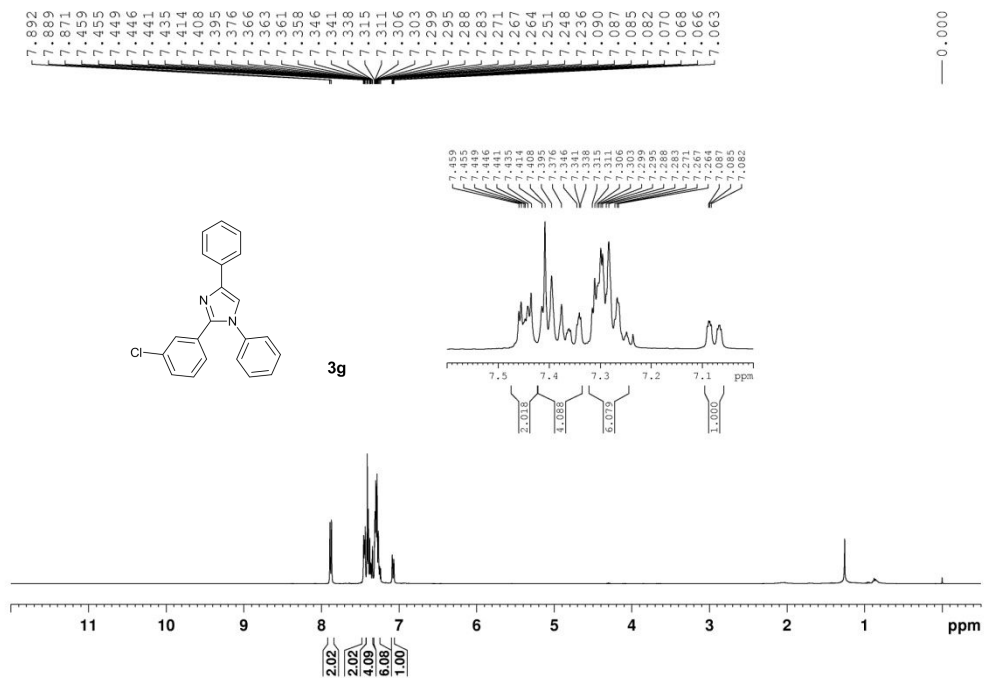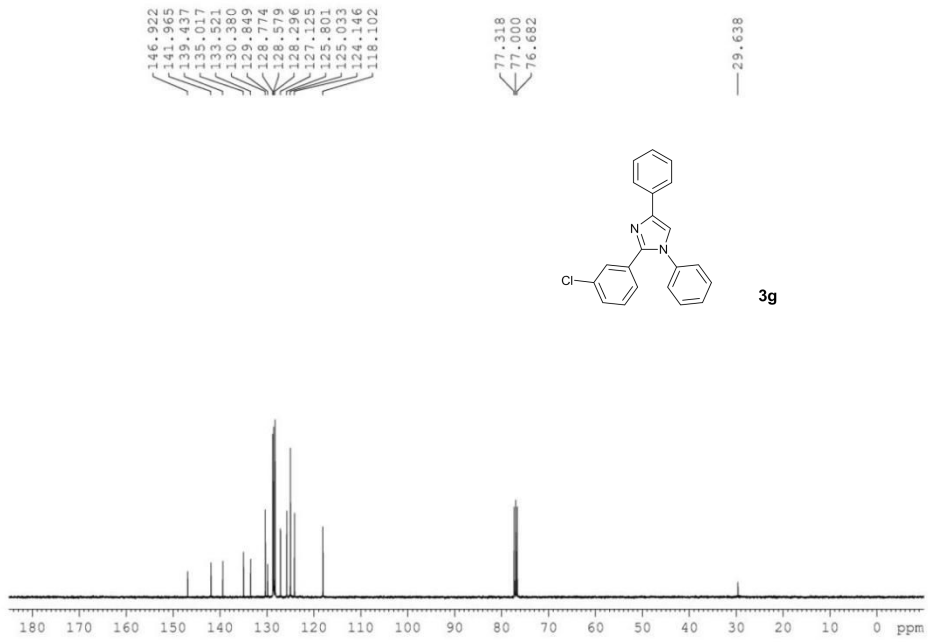



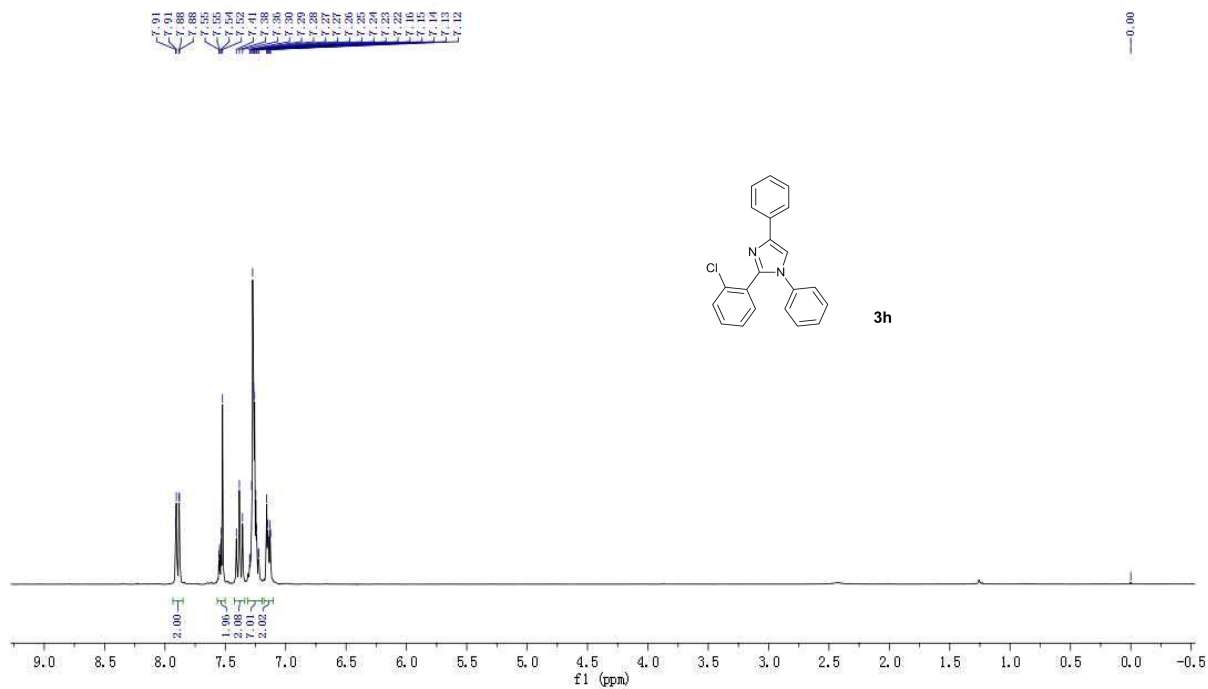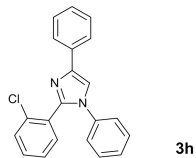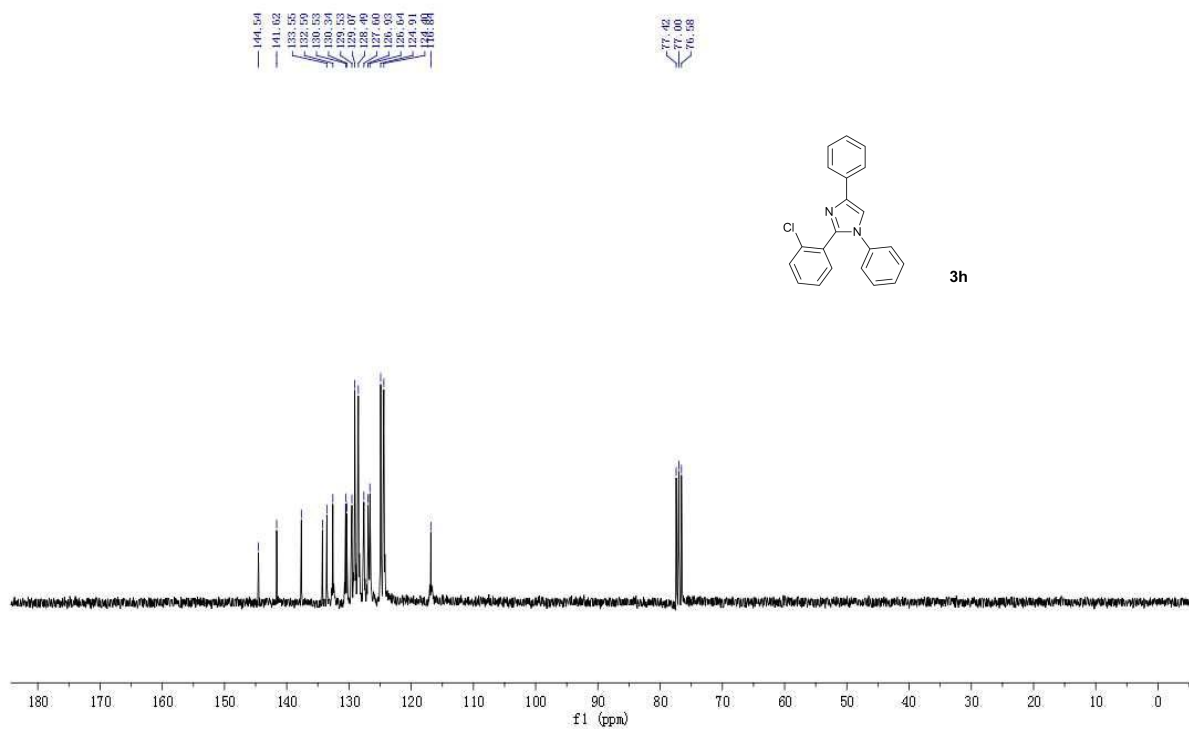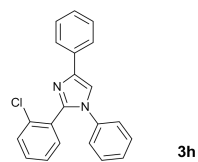

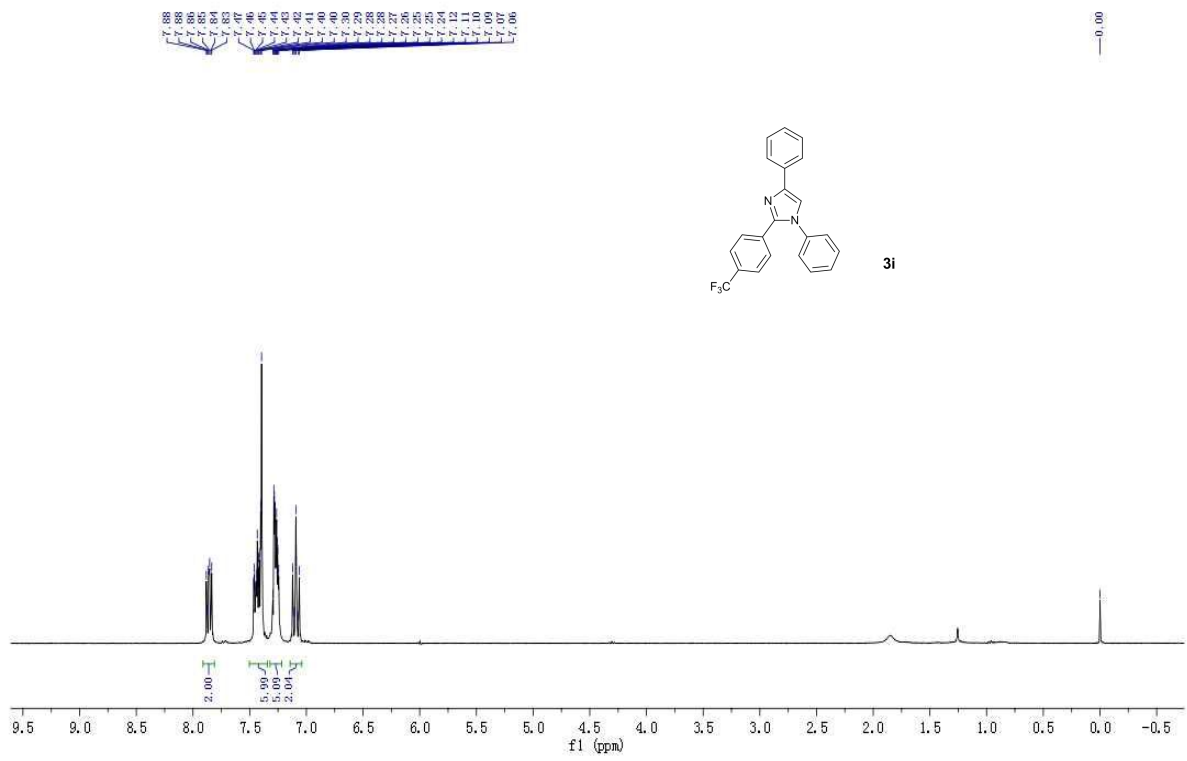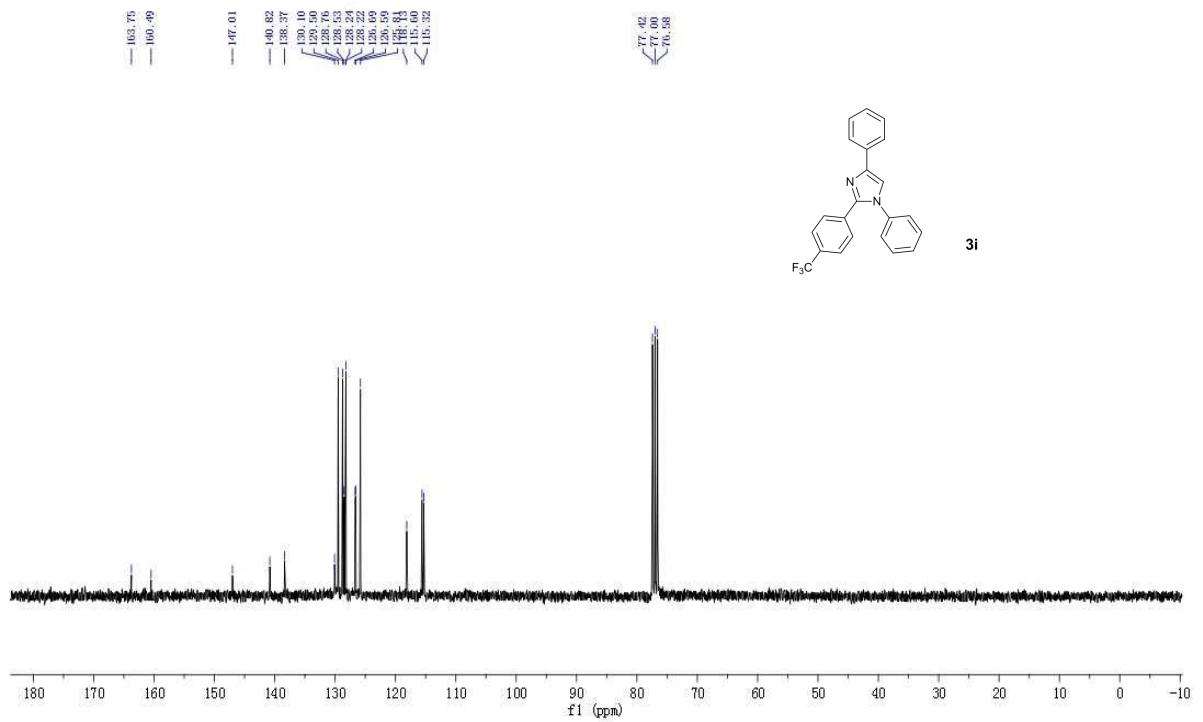

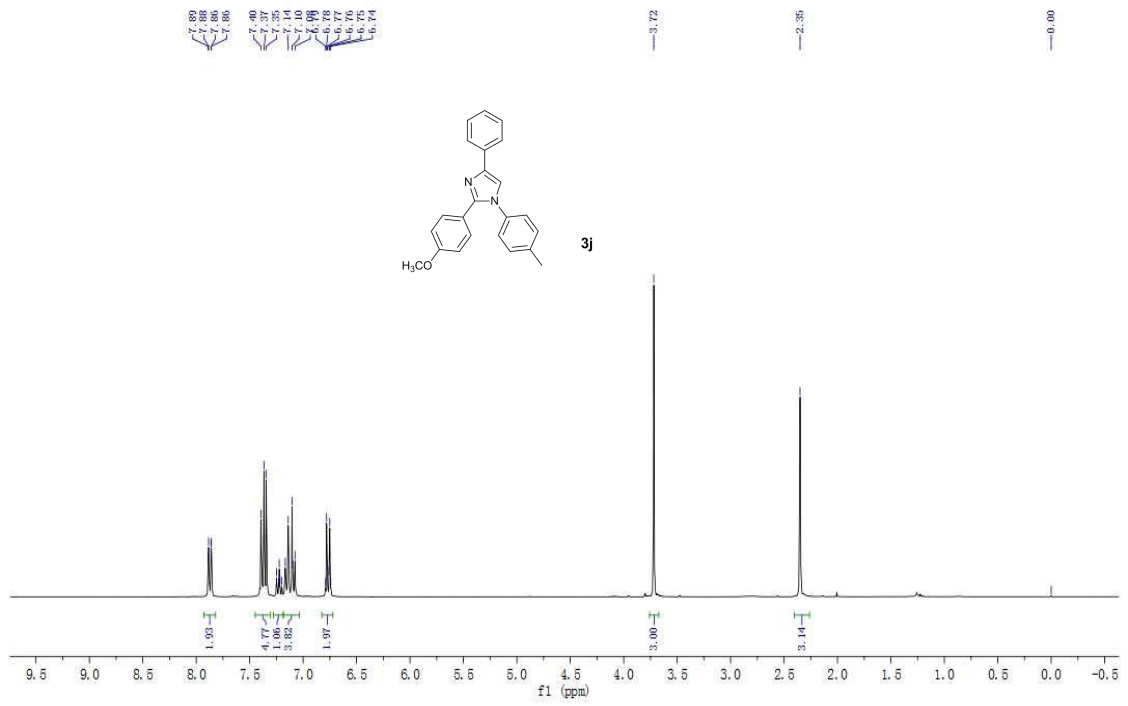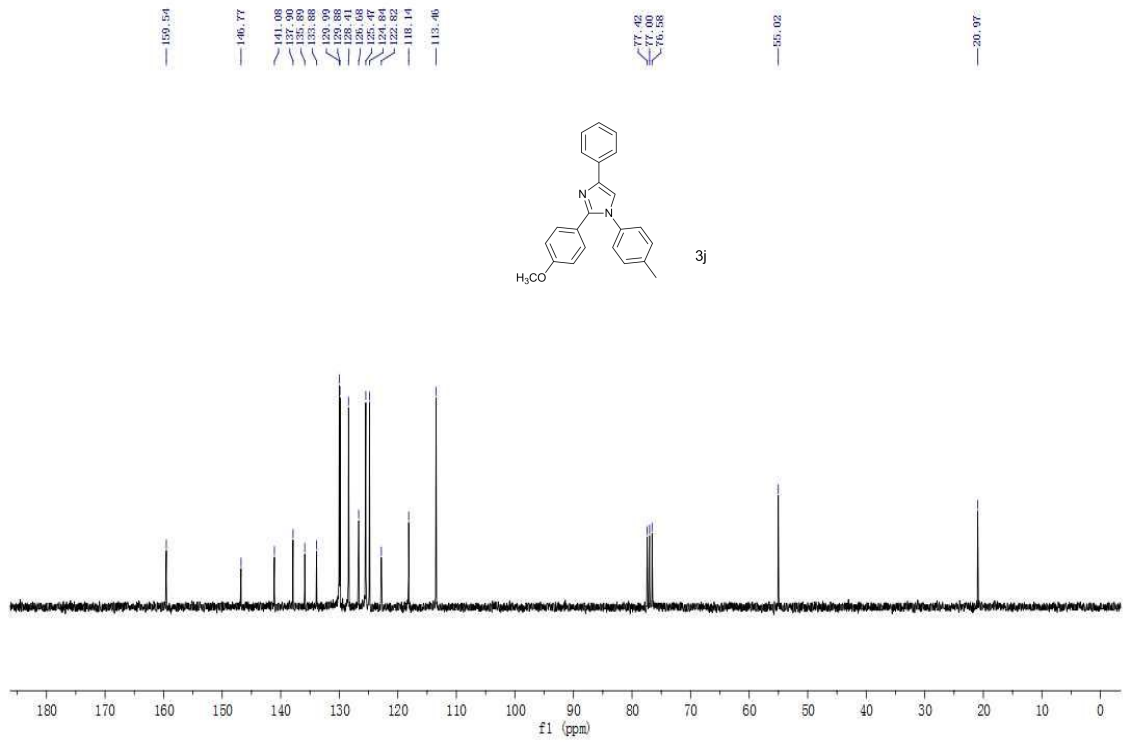

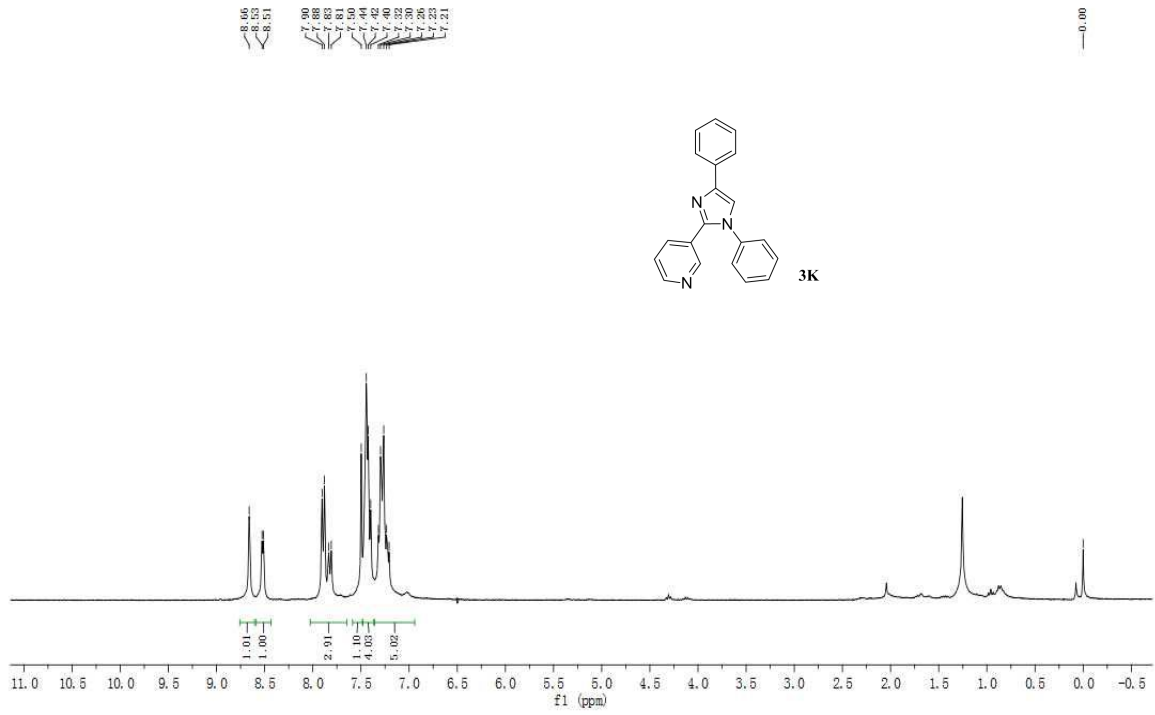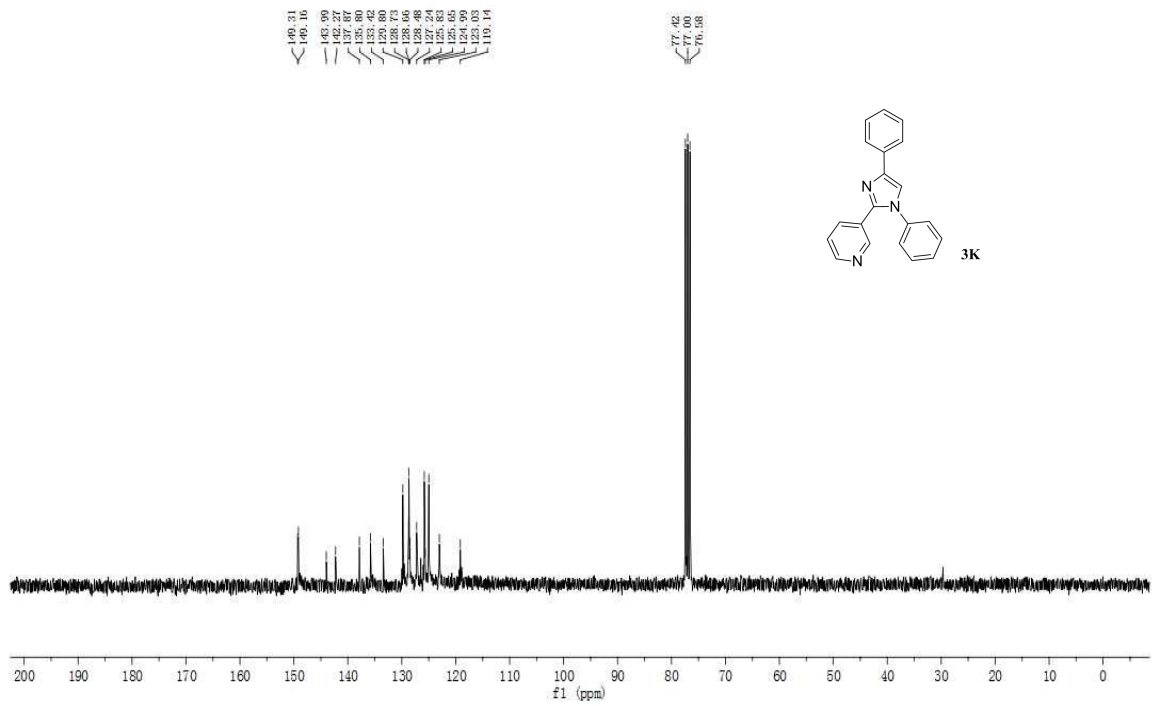

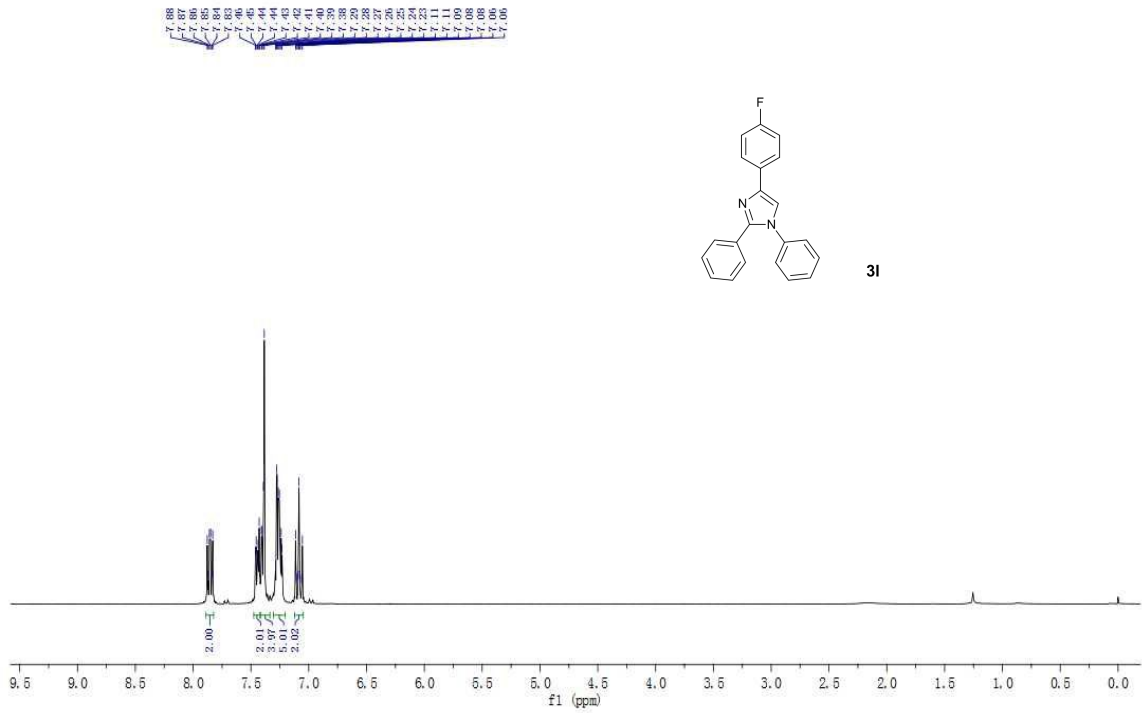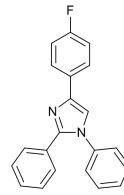

31

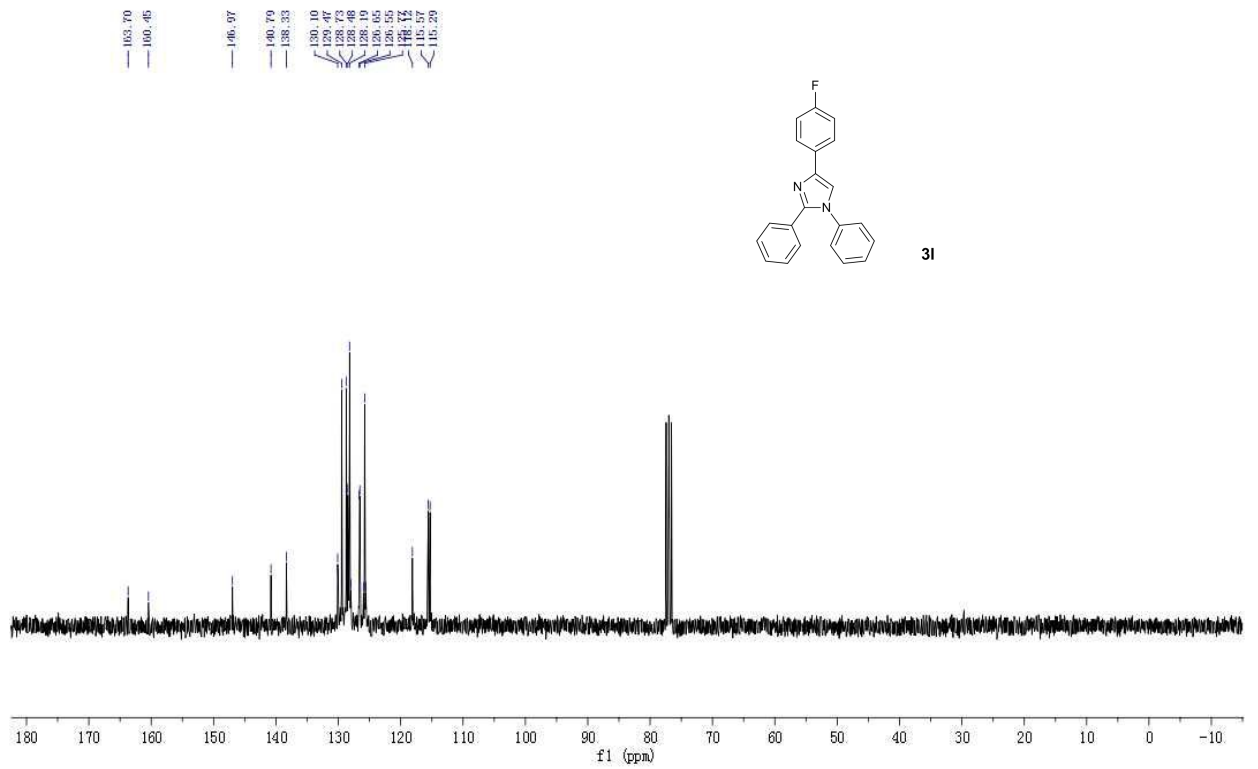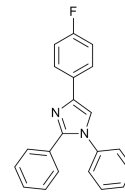

31

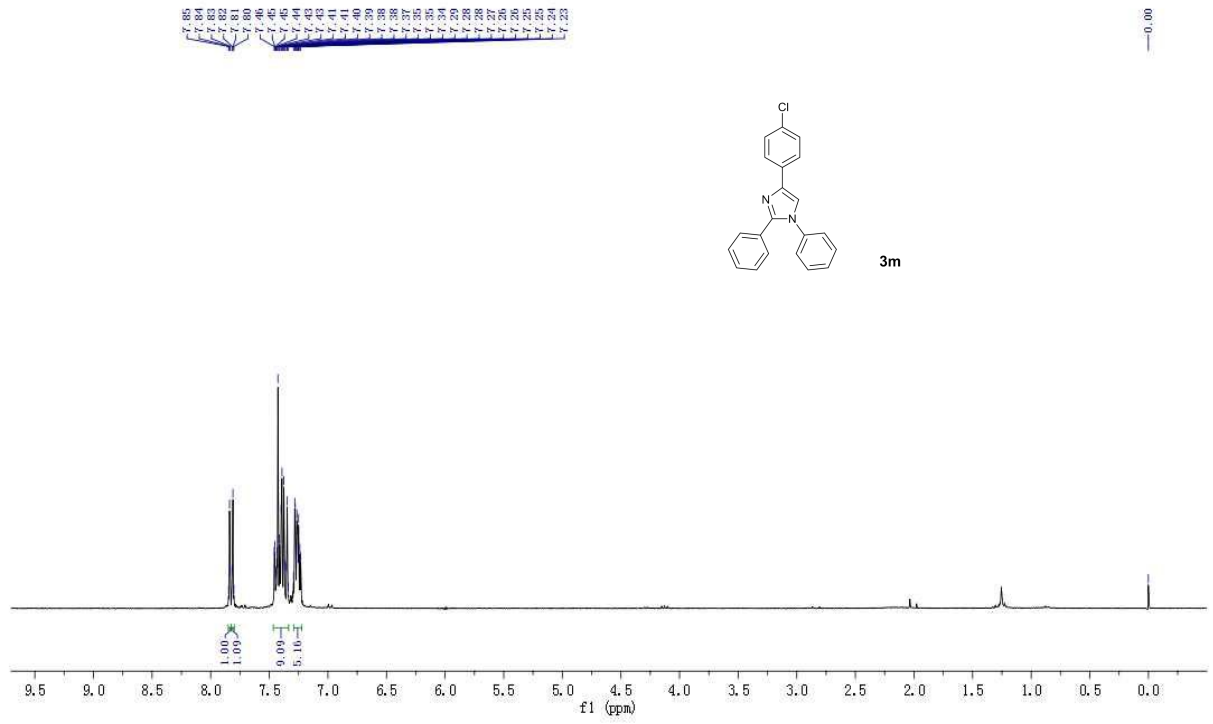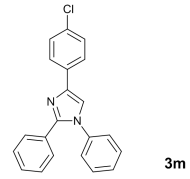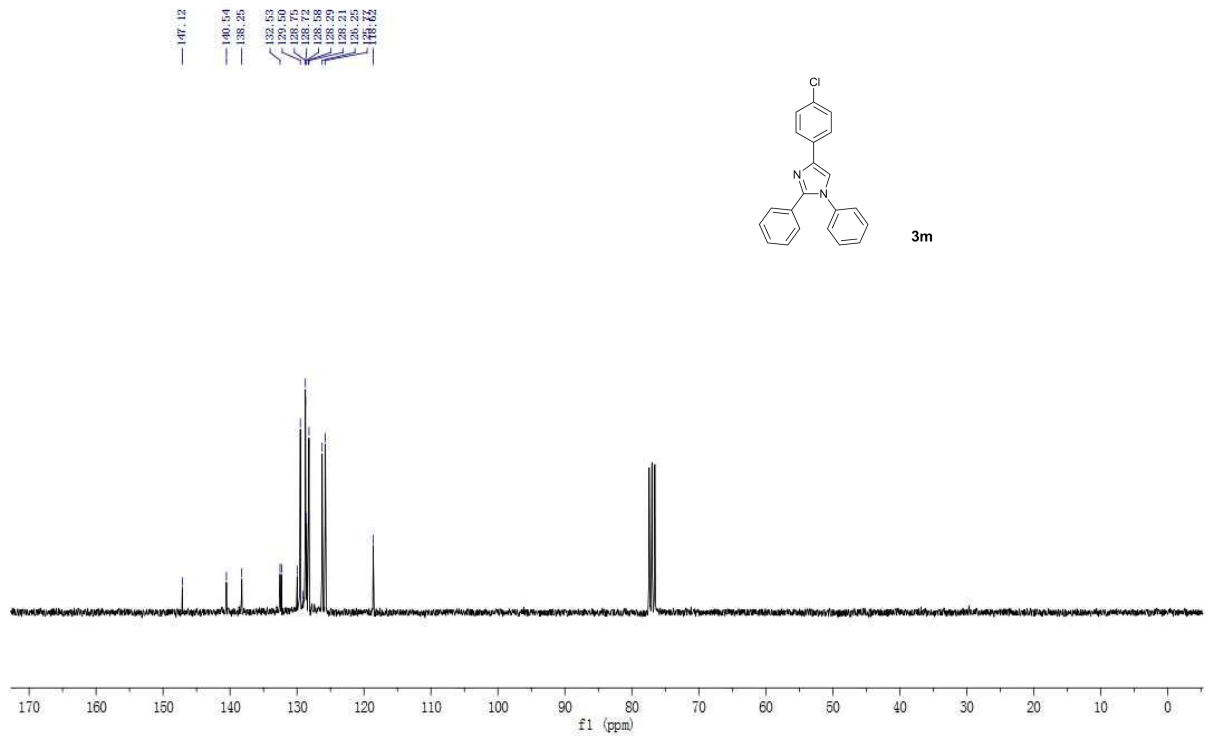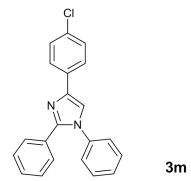

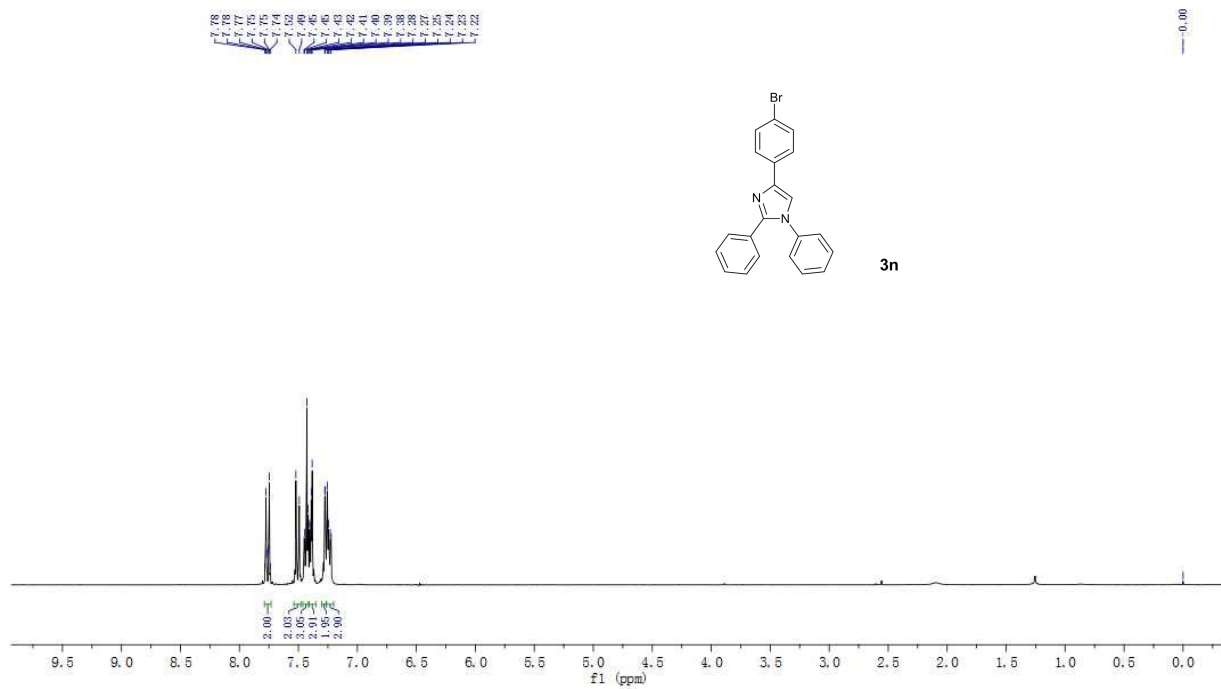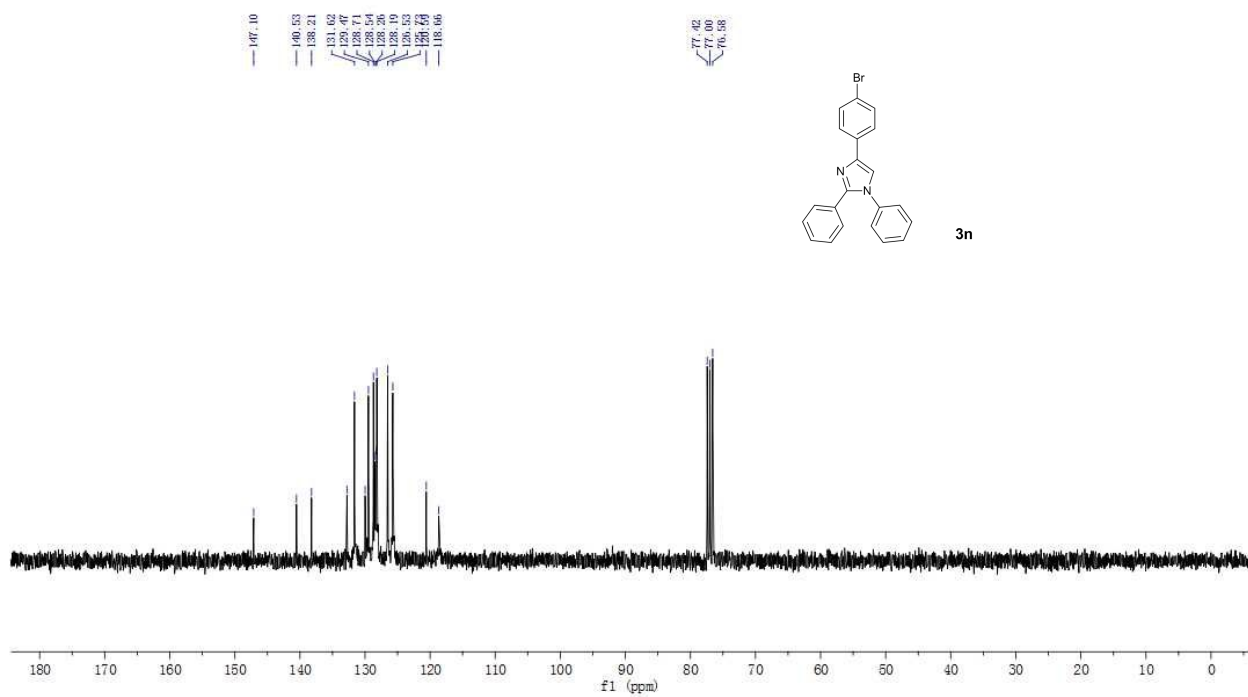

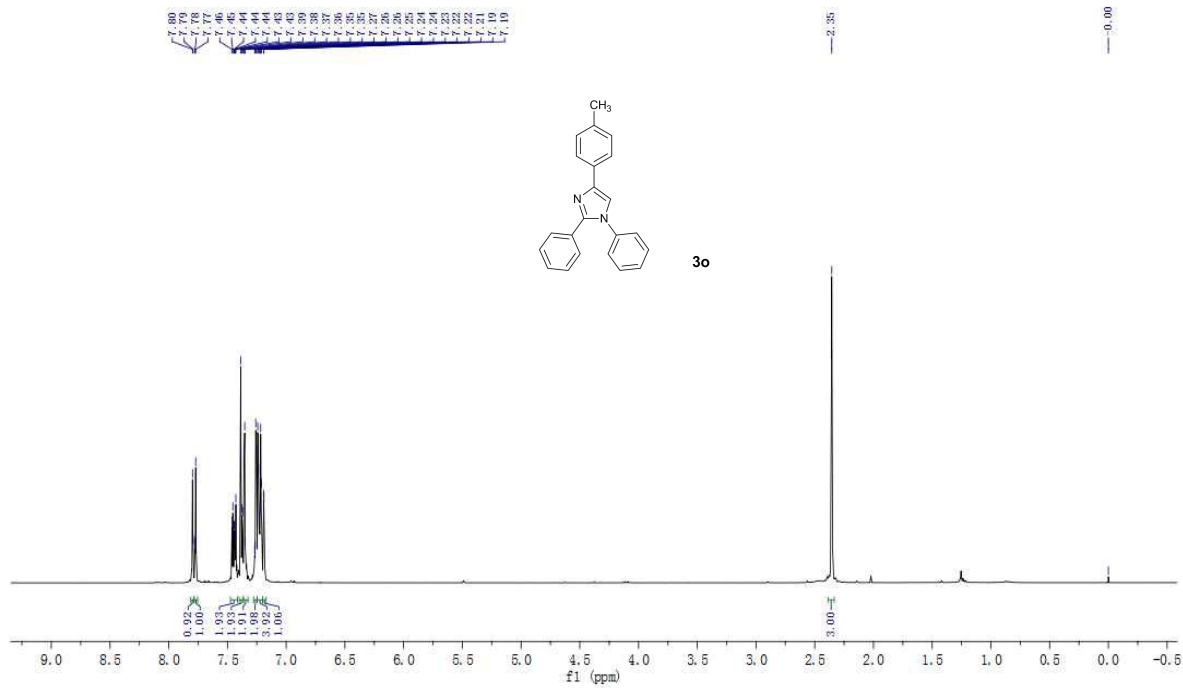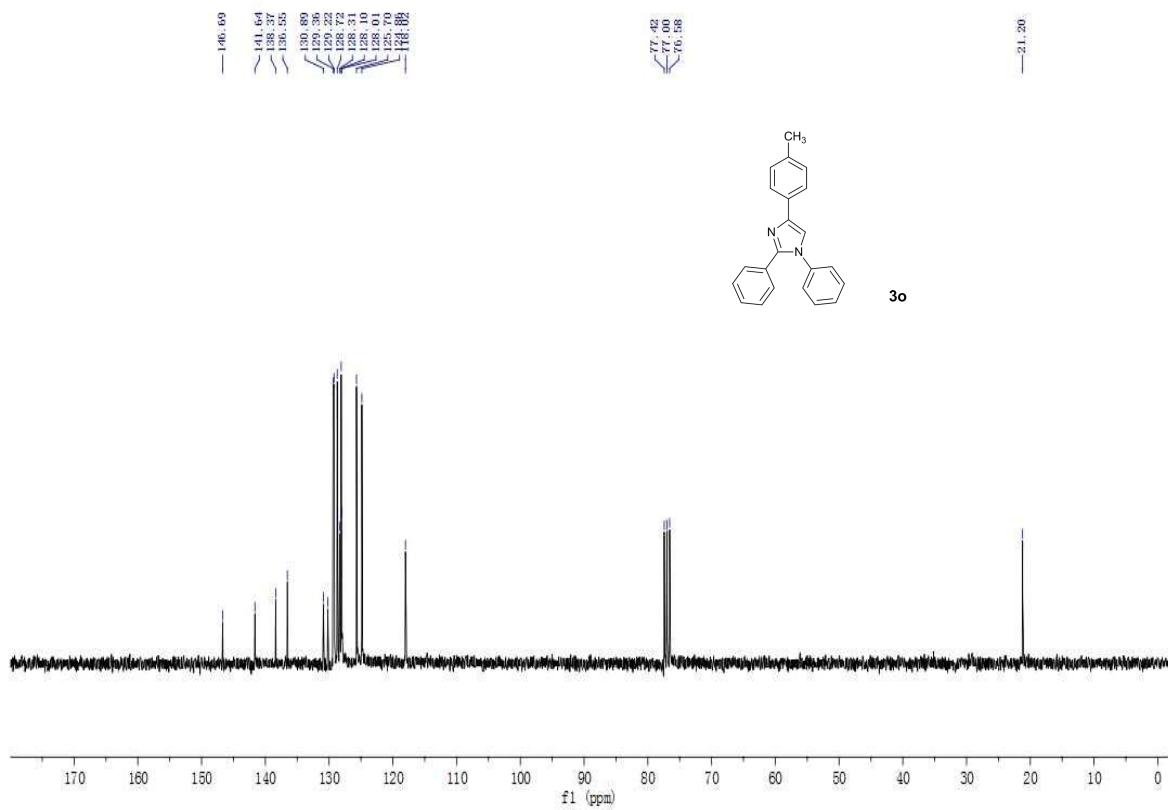



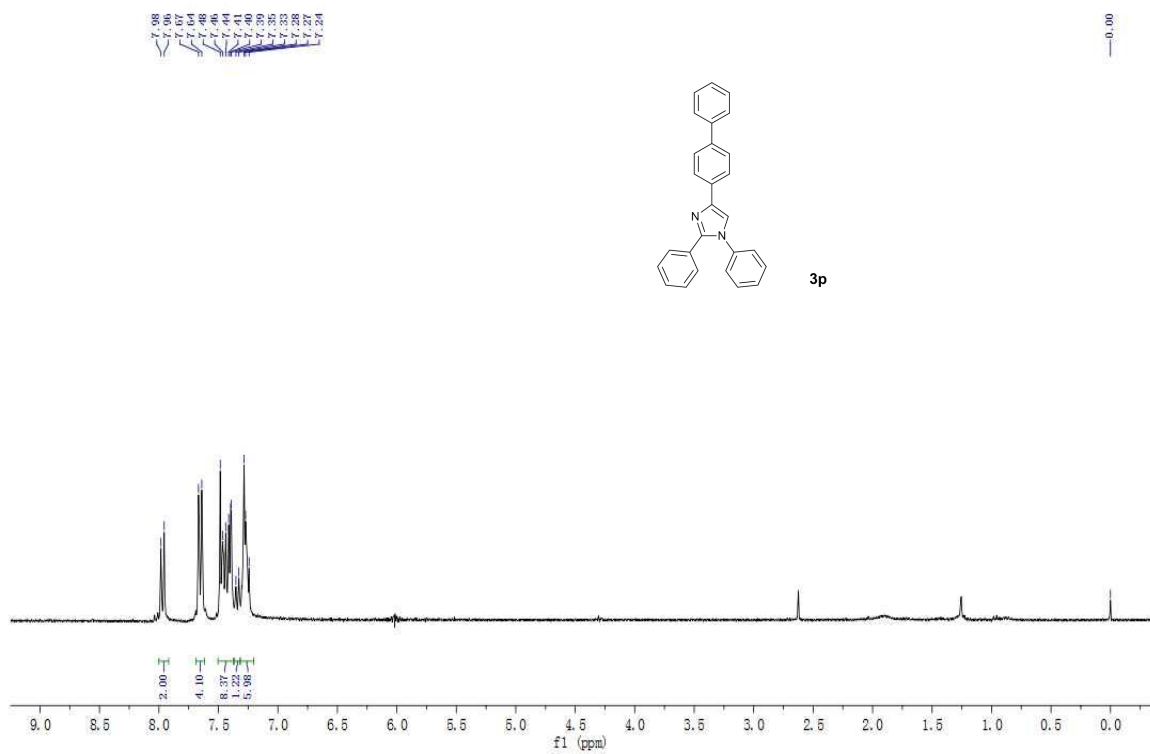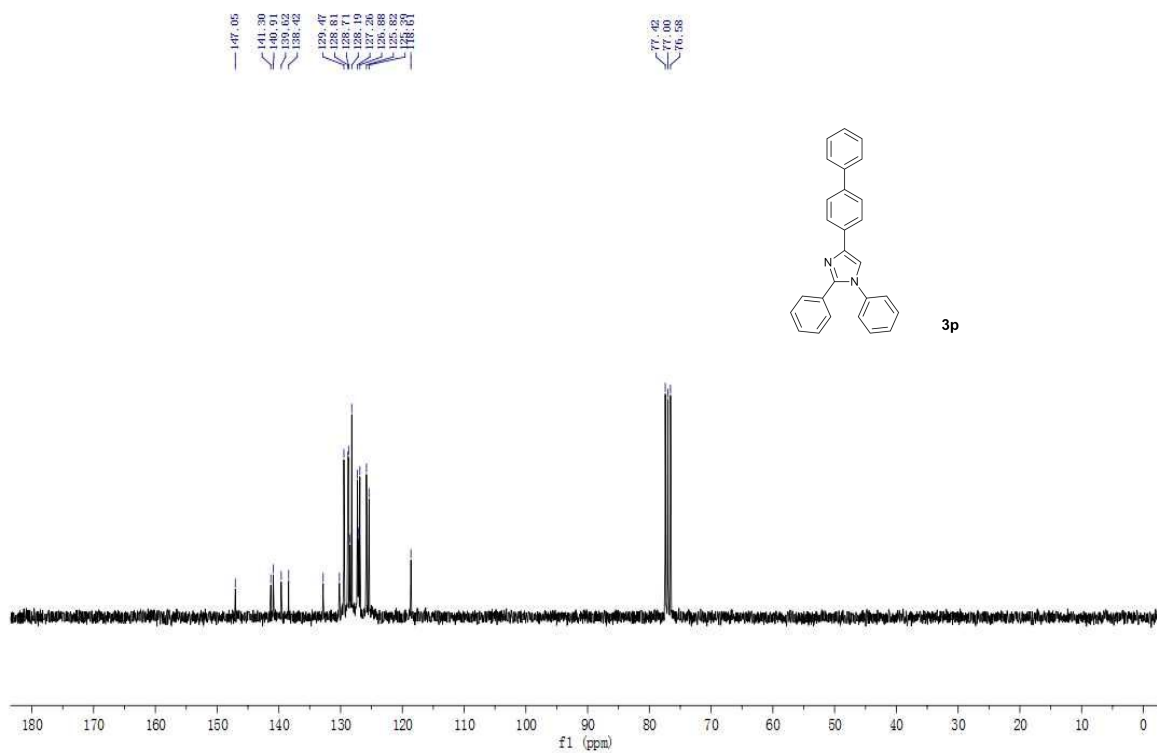

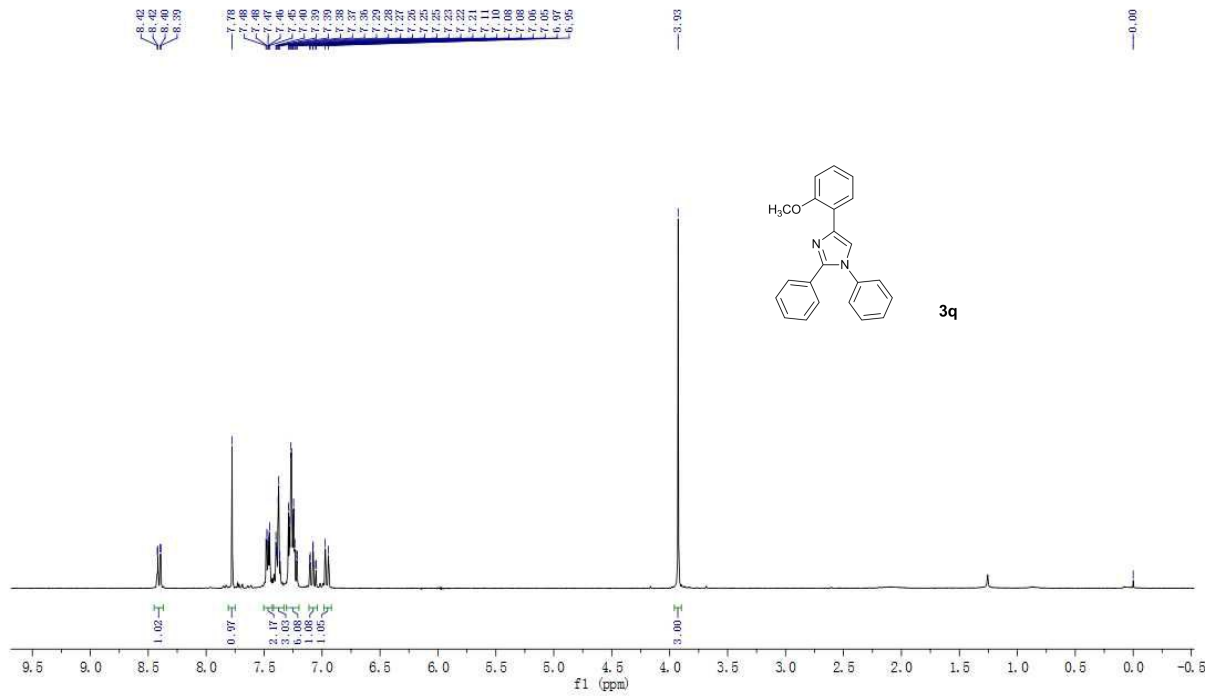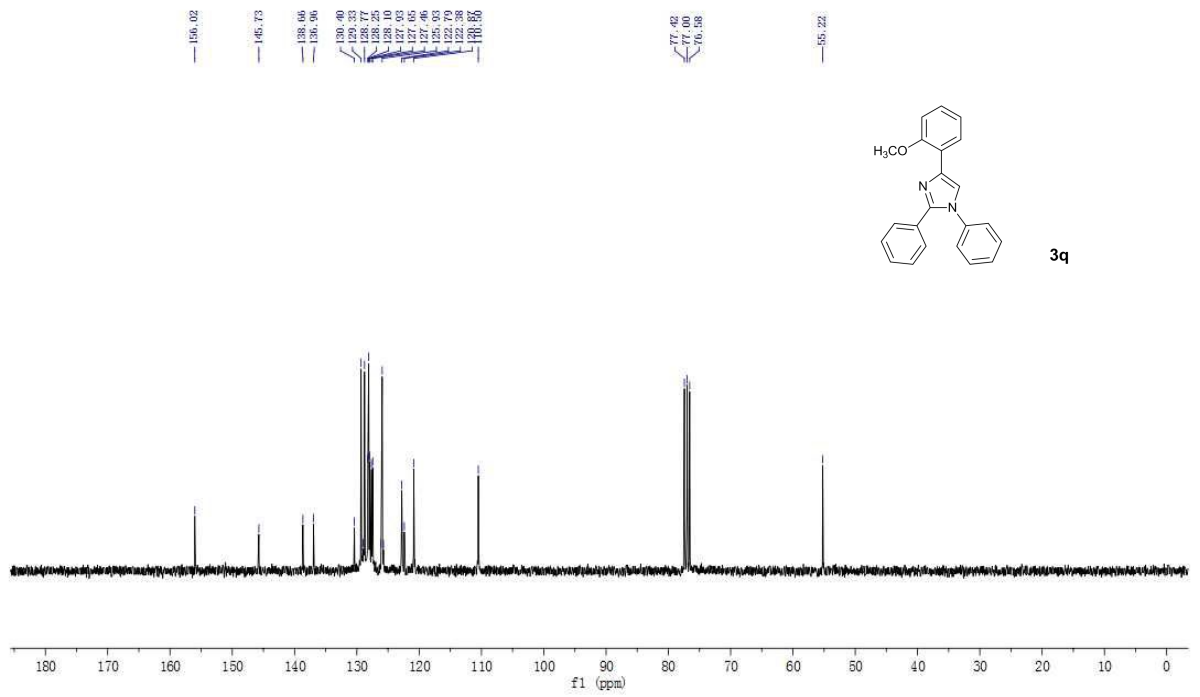

8.01  
7.66  
7.63  
7.52  
7.46  
7.45  
7.44  
7.42  
7.41  
7.40  
7.39  
7.29  
7.28  
7.26  
7.25  
7.24

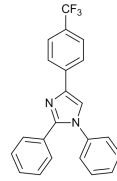

3r

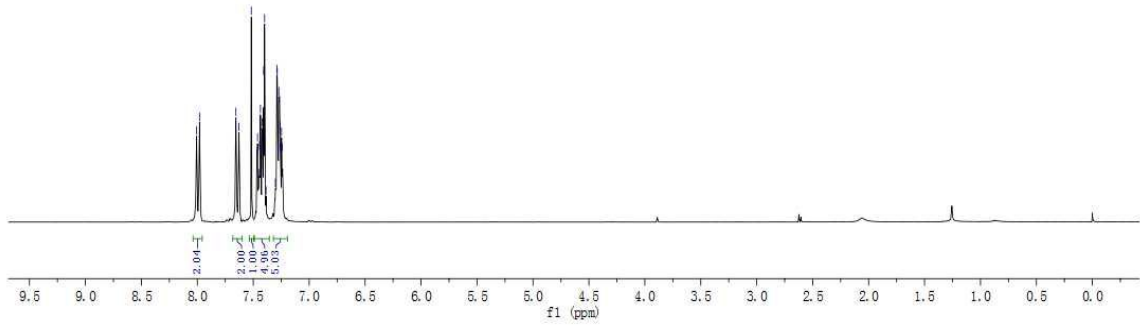

147.43  
138.15  
137.20  
136.50  
129.52  
128.86  
128.75  
128.46  
128.25  
124.18  
125.57  
125.52  
124.97  
124.66  
119.56

77.42  
77.00  
76.58

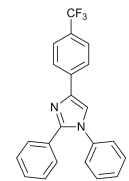

3r

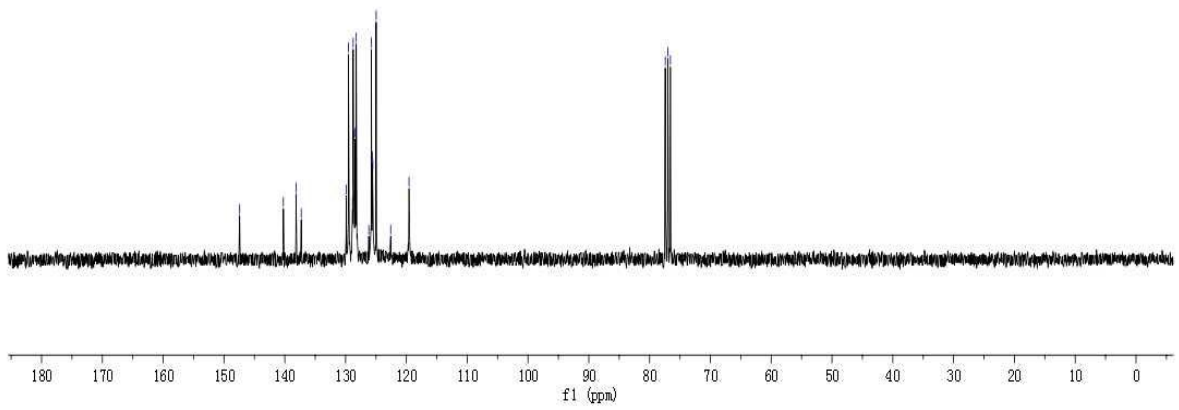

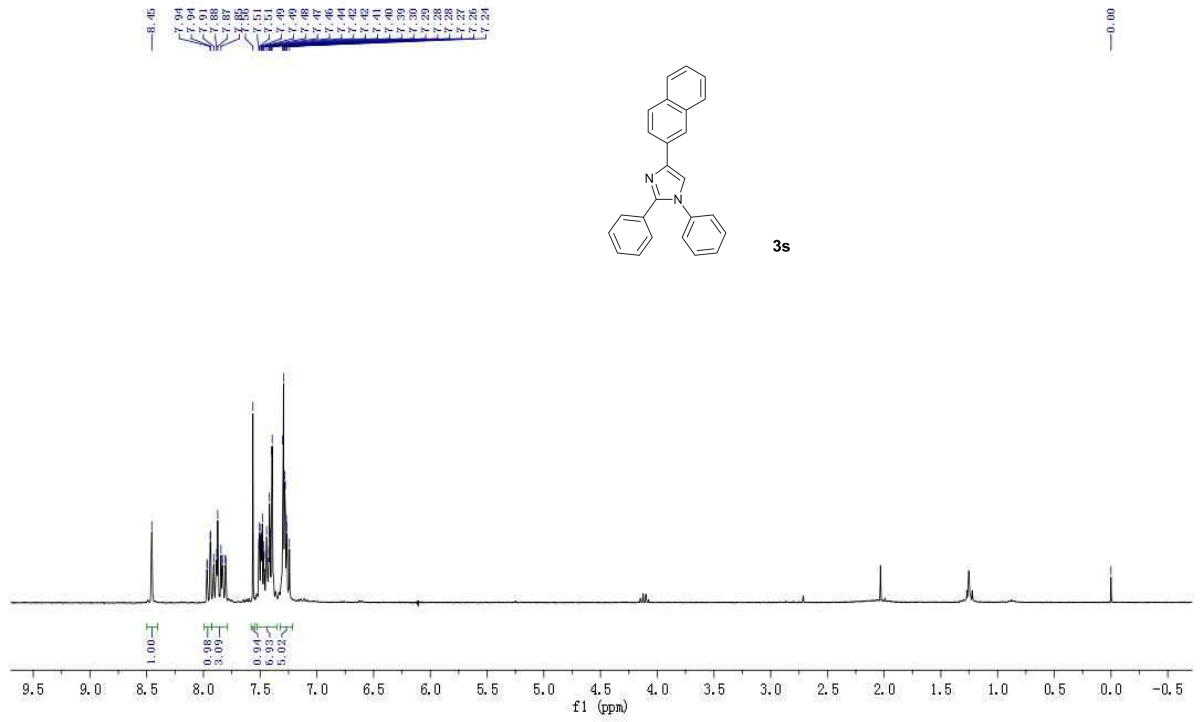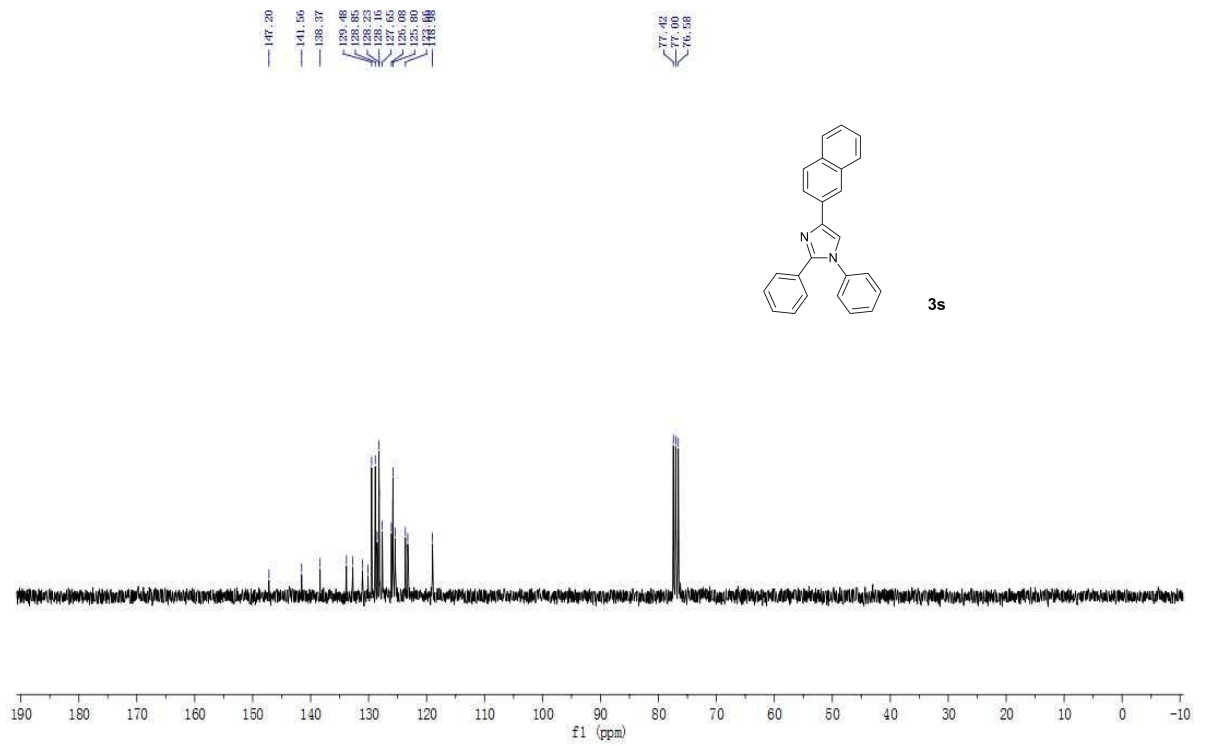

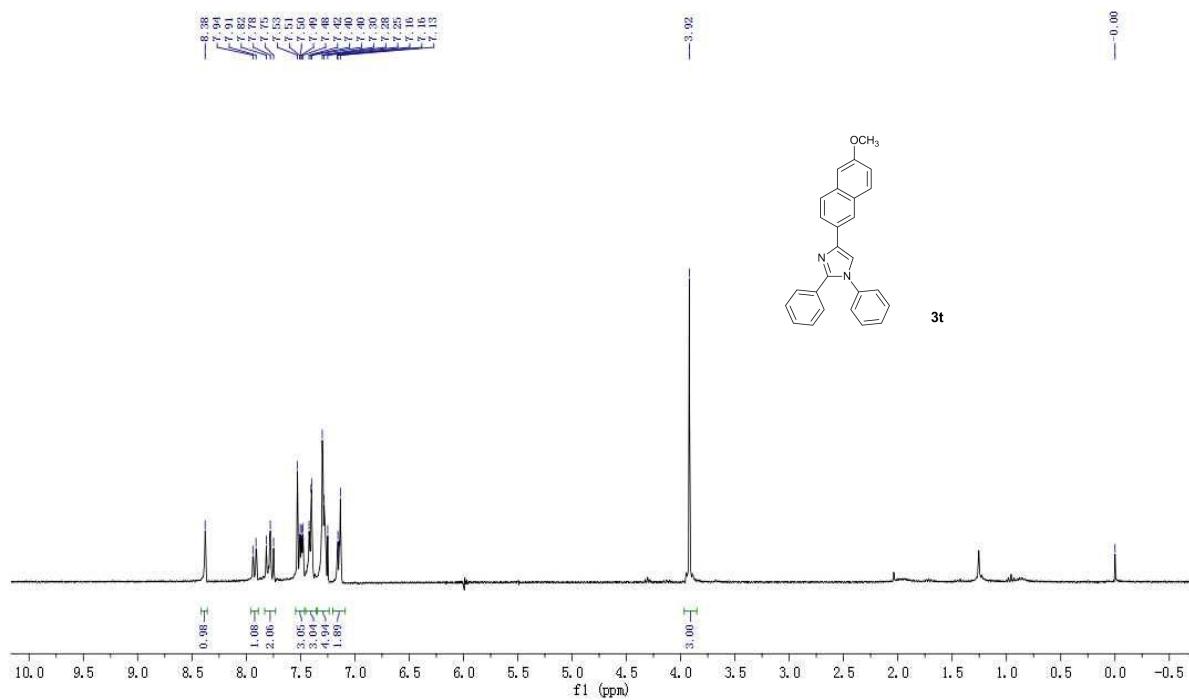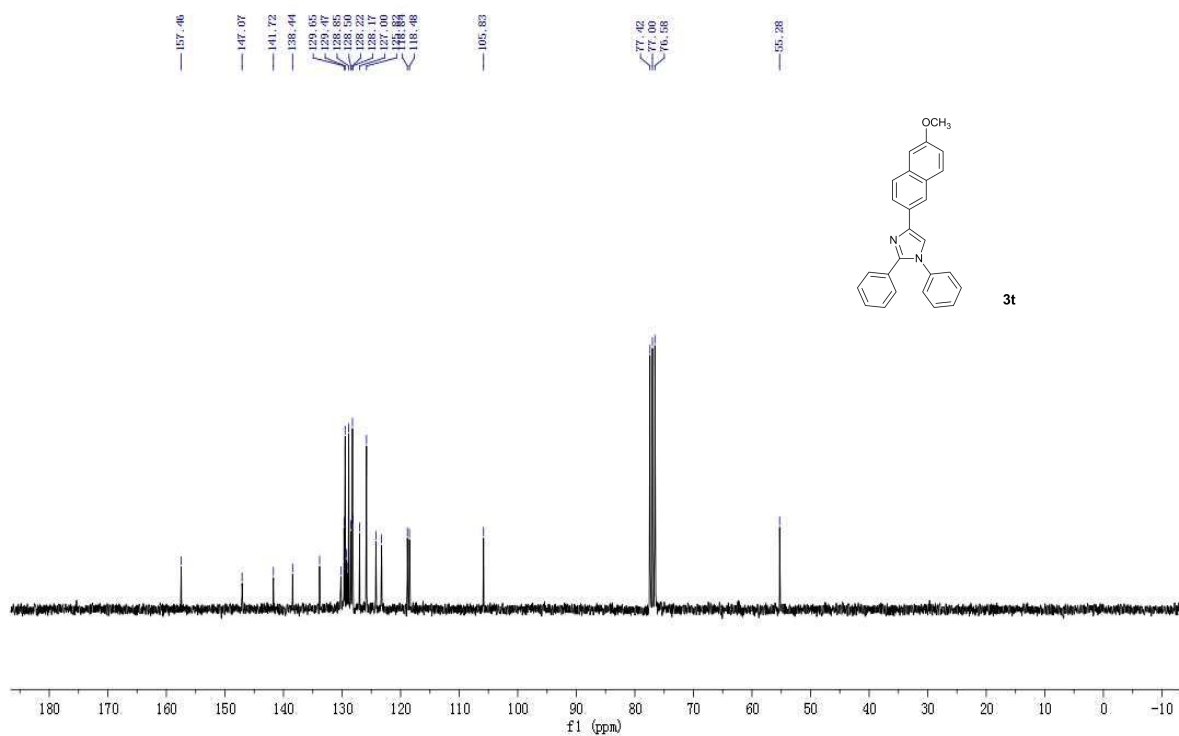

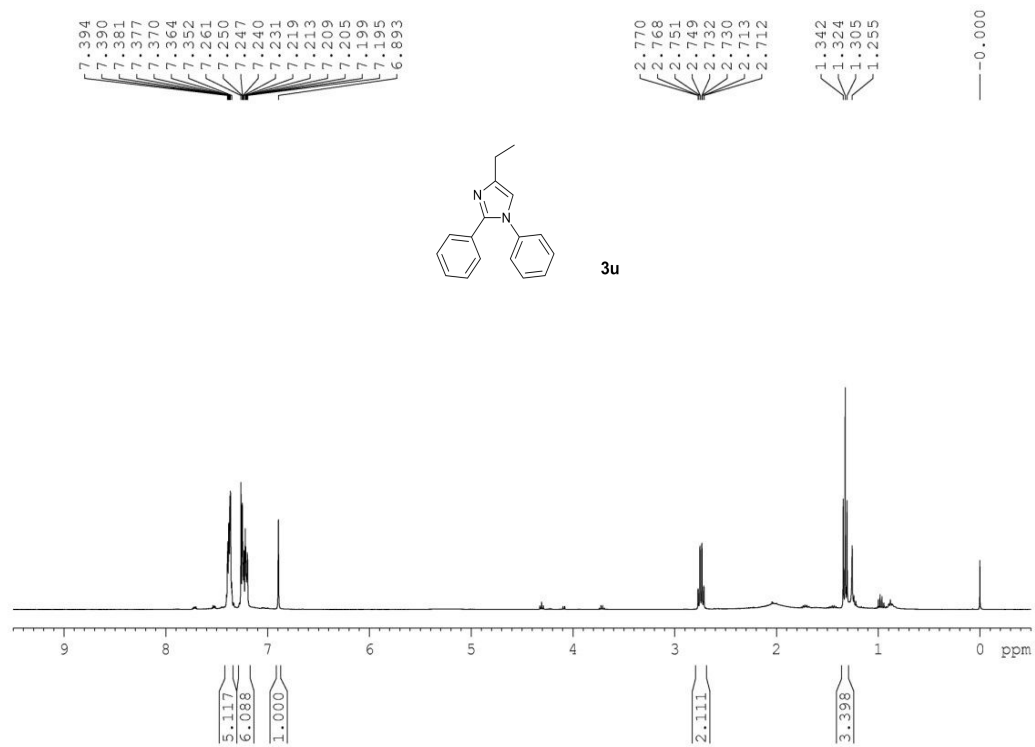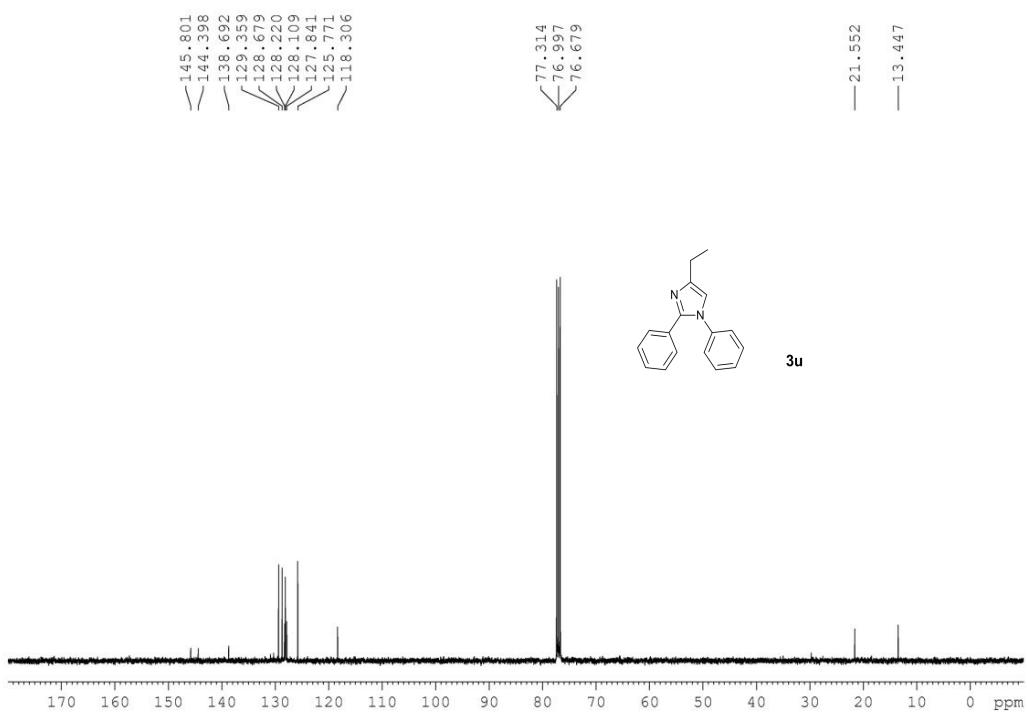

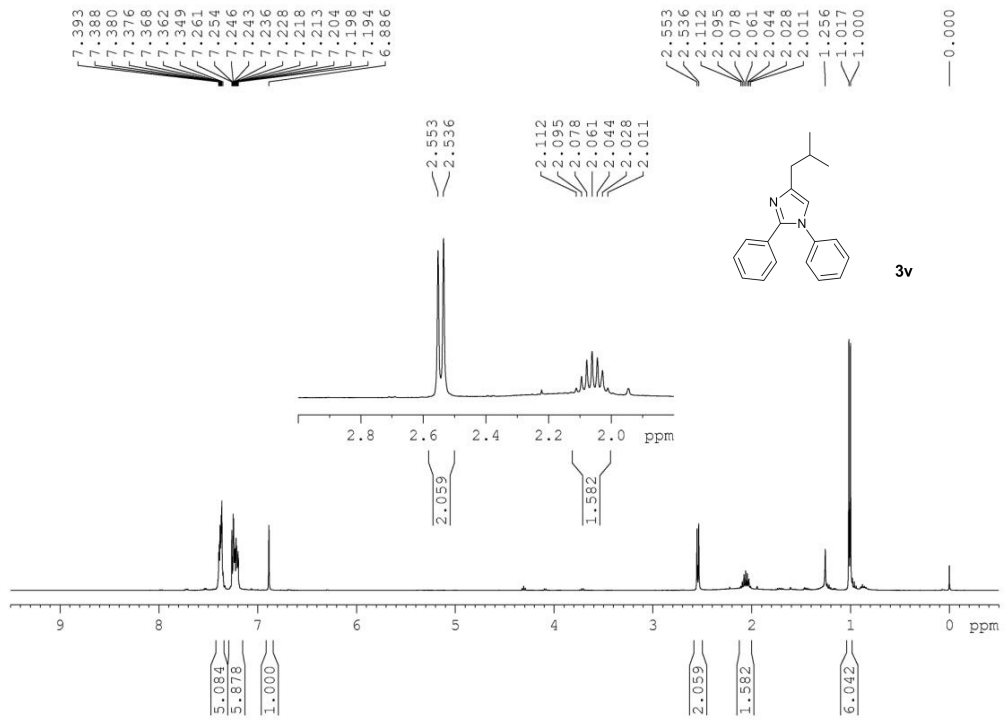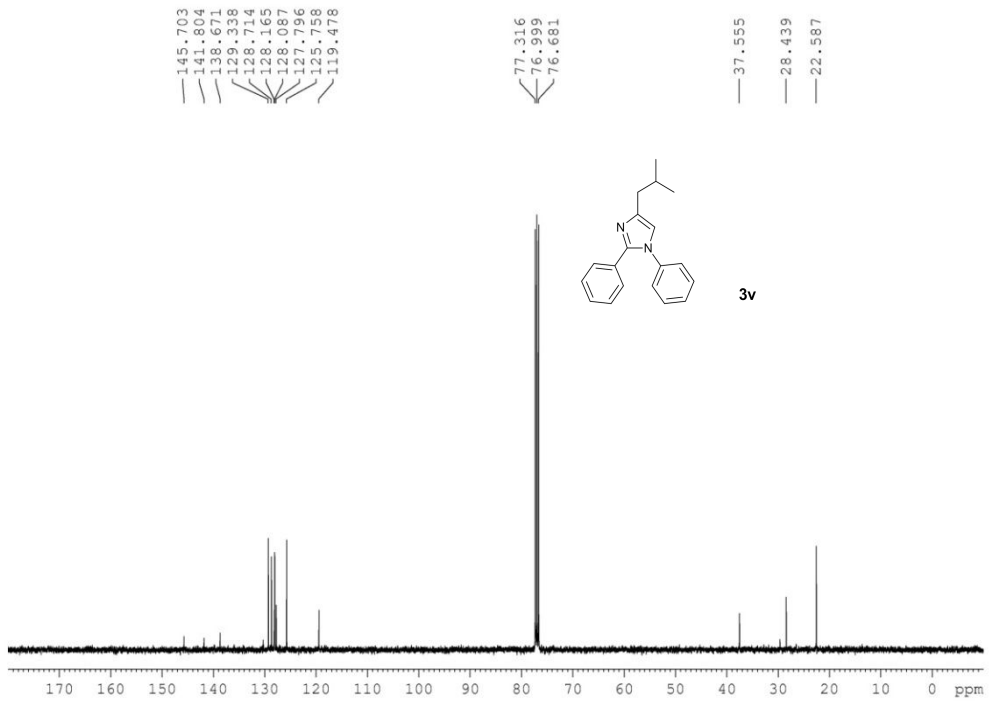

## 2) Spectra data of the compounds

### 2.1

*1,2,4-triphenyl-1H-imidazole 3a*. 0.2 mmol, 50 mg, 85%; Light yellow oil; <sup>1</sup>H NMR (300 MHz, CDCl<sub>3</sub>) δ 7.90 (d, *J* = 7.3 Hz, 2H), 7.46 (dd, *J* = 7.1, 2.0 Hz, 3H), 7.44 – 7.36 (m, 5H), 7.34 – 7.19 (m, 7H). <sup>13</sup>C NMR (100 MHz, CDCl<sub>3</sub>) δ 146.9, 141.6, 138.4, 133.8, 129.4, 128.8, 128.5, 128.4, 128.1, 126.9, 125.7, 124.9, 118.5.

### 2.2

*2,4-diphenyl-1-(o-tolyl)-1H-imidazole 3b*. 0.2 mmol, 54 mg, 88%; Yellow oil; <sup>1</sup>H NMR (300 MHz, CDCl<sub>3</sub>) δ 7.91 (dd, *J* = 8.2, 1.0 Hz, 2H), 7.49 – 7.43 (m, 2H), 7.38 (t, *J* = 7.6 Hz, 2H), 7.29 – 7.23 (m, 5H), 7.23 – 7.17 (m, 3H), 1.96 (s, 3H). <sup>13</sup>C NMR (75 MHz, CDCl<sub>3</sub>) δ 147.1, 141.5, 137.7, 134.9, 133.8, 131.2, 130.4, 129.1, 128.7, 128.3, 128.2, 128.0, 127.6, 127.2, 126.9, 126.8, 124.9, 17.4.

### 2.3

*1-(3-ethylphenyl)-2,4-diphenyl-1H-imidazole 3c*. 0.2 mmol, 52 mg, 81%; Yellow oil; <sup>1</sup>H NMR (300 MHz, CDCl<sub>3</sub>) δ 7.95 – 7.87 (m, 2H), 7.47 (ddd, *J* = 4.2, 2.7, 0.9 Hz, 2H), 7.44 – 7.36 (m, 3H), 7.33 (d, *J* = 7.5 Hz, 2H), 7.29 – 7.26 (m, 2H), 7.24 – 7.17 (m, 3H), 2.33 (tt, *J* = 12.2, 7.4 Hz, 2H), 0.98 (t, *J* = 7.6 Hz, 3H). <sup>13</sup>C NMR (75 MHz, CDCl<sub>3</sub>) δ 163.7, 147.3, 141.4, 140.6, 137.2, 133.9, 130.3, 129.5, 129.4, 128.6, 128.3, 128.2, 127.8, 126.9, 125.0, 119.0, 23.6, 14.0.

### 2.4

*4-phenyl-1,2-di-p-tolyl-1H-imidazole 3d*. 0.2 mmol, 59 mg, 92%; Yellow oil; <sup>1</sup>H NMR (300 MHz, CDCl<sub>3</sub>) δ 7.93 – 7.84 (m, 2H), 7.45 – 7.32 (m, 5H), 7.26 (dd, *J* = 4.6, 3.4 Hz, 1H), 7.23 – 7.15 (m, 2H), 7.13 (d, *J* = 8.2 Hz, 2H), 7.07 (dd, *J* = 7.9, 0.6 Hz, 2H), 2.38 (s, 3H), 2.31 (s, 3H). <sup>13</sup>C NMR (75 MHz, CDCl<sub>3</sub>) δ 147.0, 141.3, 138.2, 138.0, 136.0, 133.9, 130.0, 128.8, 128.6, 128.5, 127.4, 126.8, 125.6, 125.0, 118.4, 21.2, 21.0.

### 2.5

*2-(4-chlorophenyl)-4-phenyl-1-(p-tolyl)-1H-imidazole 3e*. 0.2 mmol, 65 mg, 95%; Yellow oil; <sup>1</sup>H NMR (300 MHz, CDCl<sub>3</sub>) δ 7.90 (dd, *J* = 5.2, 3.2 Hz, 2H), 7.50 – 7.44 (m, 2H), 7.43 – 7.35 (m, 3H), 7.31 – 7.21 (m, 5H), 7.18 (d, *J* = 7.7 Hz, 1H), 7.10 (s, 1H), 7.01 (d, *J* = 7.7 Hz, 1H), 2.34 (s, 3H). <sup>13</sup>C NMR (75 MHz, CDCl<sub>3</sub>) δ 146.8, 141.5, 139.6, 138.3, 133.8, 130.2, 129.4, 129.1, 128.9, 128.7, 128.5, 128.3, 128.1, 126.9, 126.2, 125.0, 123.0, 118.6, 21.2.

### 2.6

*1-(4-chlorophenyl)-2,4-diphenyl-1H-imidazole 3f*. 0.2 mmol, 62 mg, 94%; Yellow oil; <sup>1</sup>H NMR (300 MHz, CDCl<sub>3</sub>) δ 7.92 – 7.87 (d, *J* = 1.4 Hz, 1H), 7.87 – 7.83 (d, *J* = 0.8 Hz, 1H), 7.46 – 7.44 (d, *J* = 2.0 Hz, 1H), 7.44 – 7.40 (m, 2H), 7.39 (s, 2H), 7.38 – 7.33 (m, 3H), 7.32 – 7.23 (m, 5H), 7.20 – 7.17 (m, 1H), 7.17 – 7.14 (m, 1H). <sup>13</sup>C NMR (75 MHz, CDCl<sub>3</sub>) δ 147.2, 142.1, 137.1, 134.2, 133.8, 130.1, 130.0, 129.1, 128.9, 128.8, 128.6, 127.4, 127.2, 125.3, 118.4.

### 2.7

*2-(3-chlorophenyl)-1,4-diphenyl-1H-imidazole 3g*. 0.2 mmol, 55 mg, 83%; Yellow oil; <sup>1</sup>H NMR (400 MHz, CDCl<sub>3</sub>) δ 7.91 – 7.69 (d, *J* = 7.2 Hz, 2H), 7.48 – 7.43 (m, 2H), 7.42 – 7.33 (m, 4H), 7.32 – 7.25 (m, 6H), 7.09 – 7.08 (t, *J* = 1.0 Hz, 1H). <sup>13</sup>C NMR (100 MHz, CDCl<sub>3</sub>) δ 146.9, 142.0, 139.4, 135.0, 133.5, 130.4, 129.8, 128.8, 128.6, 128.3, 127.1, 125.8, 125.0, 124.1, 118.1.

### 2.8

*2-(2-chlorophenyl)-1,4-diphenyl-1H-imidazole 3h*. 0.2 mmol, 54 mg, 82%; Yellow oil; <sup>1</sup>H NMR (300 MHz, CDCl<sub>3</sub>) δ 7.89 (dd, *J* = 8.1, 1.0 Hz, 2H), 7.57 – 7.50 (m, 2H), 7.38 (t, *J* = 7.6 Hz, 2H), 7.31 – 7.20 (m, 7H), 7.18 – 7.10 (m, 2H). <sup>13</sup>C NMR (75 MHz, CDCl<sub>3</sub>) δ 145.0, 142.0, 134.8, 133.2, 131.2,



130.1, 129.6, 129.0, 128.2, 127.6, 127.2, 125.5, 125.0, 117.4.

## 2.9

*1,4-diphenyl-2-(4-(trifluoromethyl)phenyl)-1H-imidazole 3i*. 0.2 mmol, 45 mg, 62%; Yellow oil; <sup>1</sup>H NMR (300 MHz, CDCl<sub>3</sub>) δ 7.90 – 7.81 (dd, *J* = 8.9, 5.4 Hz, 2H), 7.50 – 7.35 (m, 6H), 7.31 – 7.22 (m, 5H), 7.15 – 7.03 (t, *J* = 8.8 Hz, 2H). <sup>13</sup>C NMR (75 MHz, CDCl<sub>3</sub>) δ 163.8, 160.5, 147.1, 140.8, 138.4, 130.1, 130.0, 129.5, 128.8, 128.5, 128.2, 126.7, 126.6, 125.8, 118.1, 115.6, 115.3.

## 2.10

*2-(4-methoxyphenyl)-4-phenyl-1-(p-tolyl)-1H-imidazole 3j*. 0.2 mmol, 45 mg, 62%; Light yellow oil; <sup>1</sup>H NMR (300 MHz, CDCl<sub>3</sub>) δ 7.87 (dd, *J* = 8.1, 1.0 Hz, 2H), 7.45 – 7.31 (m, 5H), 7.28 – 7.19 (m, 1H), 7.19 – 7.03 (m, 4H), 6.82 – 6.72 (m, 2H), 3.72 (s, 3H), 2.35 (s, 3H). <sup>13</sup>C NMR (75 MHz, CDCl<sub>3</sub>) δ 159.6, 146.8, 141.0, 137.9, 135.9, 133.9, 130.0, 129.9, 128.4, 126.8, 125.5, 124.8, 122.8, 118.3, 113.4, 55.0, 21.0.

## 2.11

*3-(1,4-diphenyl-1H-imidazol-2-yl)pyridine 3k*. 0.2 mmol, 30.9mg, 52%; Yellow oil; <sup>1</sup>H NMR (300 MHz, CDCl<sub>3</sub>) δ 8.66 (s, 1H), 8.52 (d, *J* = 4.0 Hz, 1H), 7.86 (dd, *J* = 21.0, 7.7 Hz, 3H), 7.50 (s, 1H), 7.48-7.37 (m, 4H), 7.36 -6.94 (m, 5H). <sup>13</sup>C NMR (75 MHz, CDCl<sub>3</sub>) δ 149.3, 149.1, 144.0, 142.3, 137.9, 135.8, 133.4, 129.8, 128.7, 128.6, 128.6, 127.2, 125.8, 125.6, 125.0, 123.0, 119.1.

## 2.12

*4-(4-fluorophenyl)-1,2-diphenyl-1H-imidazole 3l*. 0.2 mmol, 43 mg, 69%; Yellow oil; <sup>1</sup>H NMR (300 MHz, CDCl<sub>3</sub>) δ 7.89 – 7.82 (m, 2H), 7.44 (dt, *J* = 4.6, 1.8 Hz, 2H), 7.40 (dd, *J* = 5.3, 2.0 Hz, 4H), 7.26 (dq, *J* = 6.7, 2.4 Hz, 5H), 7.12 – 7.05 (m, 2H). <sup>13</sup>C NMR (100 MHz, CDCl<sub>3</sub>) δ 163.4, 160.9, 147.0, 140.8, 138.4, 130.0, 129.5, 128.8, 128.6, 128.3, 128.2, 126.8, 126.7, 125.8, 118.2, 115.6, 115.4.

## 2.13

*4-(4-chlorophenyl)-1,2-diphenyl-1H-imidazole 3m*. 0.2 mmol, 55 mg, 84%; Yellow oil; <sup>1</sup>H NMR (300 MHz, CDCl<sub>3</sub>) δ 7.85 – 7.79 (m, 2H), 7.51 – 7.32 (m, 9H), 7.29 – 7.22 (ddt, *J* = 6.5, 5.4, 2.7 Hz, 5H); <sup>13</sup>C NMR (75 MHz, CDCl<sub>3</sub>) δ 147.1, 140.5, 138.3, 133.0, 132.5, 132.3, 130.0, 129.5, 129.1, 128.8, 128.7, 128.6, 128.3, 128.2, 127.8, 127.4, 126.3, 125.8, 118.6.

## 2.14

*4-(4-bromophenyl)-1,2-diphenyl-1H-imidazole 3n*. 0.2 mmol, 72 mg, 96%; Yellow oil; <sup>1</sup>H NMR (300 MHz, CDCl<sub>3</sub>) δ 7.79 – 7.73 (m, 2H), 7.51 (d, *J* = 8.6 Hz, 2H), 7.44 (dd, *J* = 7.5, 2.2 Hz, 3H), 7.40 (dd, *J* = 5.1, 1.7 Hz, 3H), 7.27 (d, *J* = 1.5 Hz, 2H), 7.24 (dd, *J* = 7.0, 2.8 Hz, 3H). <sup>13</sup>C NMR (75 MHz, CDCl<sub>3</sub>) δ 147.1, 140.5, 138.2, 132.7, 131.7, 129.9, 129.5, 128.8, 128.6, 128.3, 128.2, 126.6, 125.8, 120.7, 118.7.

## 2.15

*1,2-diphenyl-4-(p-tolyl)-1H-imidazole 3o*. 0.2 mmol, 47 mg, 77%; Yellow oil; <sup>1</sup>H NMR (300 MHz, CDCl<sub>3</sub>) δ 7.60 – 7.53 (m, 2H), 7.15 (dt, *J* = 4.6, 1.8 Hz, 2H), 7.11 (dd, *J* = 5.3, 2.0 Hz, 4H), 6.97 (dq, *J* = 6.7, 2.4 Hz, 5H), 6.83 – 6.75 (m, 2H). <sup>13</sup>C NMR (75 MHz, CDCl<sub>3</sub>) δ 146.8, 141.7, 138.5, 136.7, 130.9, 130.2, 129.4, 129.3, 128.8, 128.4, 128.2, 128.1, 125.8, 125.0, 118.1, 21.2.

## 2.16

*4-([1,1'-biphenyl]-4-yl)-1,2-diphenyl-1H-imidazole 3p*. 0.2 mmol, 66 mg, 89%; Yellow oil; <sup>1</sup>H NMR (300 MHz, CDCl<sub>3</sub>) δ 7.99 – 7.92 (d, *J* = 8.2 Hz, 2H), 7.63 – 7.76 (d, *J* = 8.2 Hz, 4H), 7.51 – 7.43 (m, 4H), 7.40 – 7.36 (dd, *J* = 10.0, 8.3 Hz, 4H), 7.34 – 7.18 (m, 6H). <sup>13</sup>C NMR (75 MHz, CDCl<sub>3</sub>) δ 147.1, 141.3, 140.9, 139.6, 138.4, 132.8, 130.2, 129.5, 128.8, 128.7, 128.5, 128.2, 127.3, 127.1, 126.9, 125.8, 125.4, 118.6.

### 2.17

*4-(2-methoxyphenyl)-1,2-diphenyl-1H-imidazole 3q*. 0.2 mmol, 51 mg, 79%; Yellow oil; <sup>1</sup>H NMR (300 MHz, CDCl<sub>3</sub>) δ 8.41 (dd, *J* = 7.7, 1.8 Hz, 1H), 7.78 (s, 1H), 7.50 – 7.43 (m, 2H), 7.38 (dt, *J* = 7.3, 2.4 Hz, 3H), 7.31 – 7.20 (m, 6H), 7.08 (td, *J* = 7.6, 1.1 Hz, 1H), 6.96 (d, *J* = 8.2 Hz, 1H), 3.93 (s, 3H). δ 156.2, 145.9, 138.8, 137.1, 129.5, 128.9, 128.4, 128.2, 128.1, 127.8, 127.6, 126.1, 122.9, 122.5, 121.0, 110.6, 110.0, 55.4.

### 2.18

*1,2-diphenyl-4-(4-(trifluoromethyl)phenyl)-1H-imidazole 3r*. 0.2 mmol, 36 mg, 50%; Yellow oil; <sup>1</sup>H NMR (300 MHz, CDCl<sub>3</sub>) δ 7.99 (d, *J* = 8.1 Hz, 2H), 7.64 (d, *J* = 8.2 Hz, 2H), 7.52 (s, 1H), 7.49 – 7.36 (m, 5H), 7.27 (ddt, *J* = 6.2, 4.9, 3.1 Hz, 5H). <sup>13</sup>C NMR (75 MHz, CDCl<sub>3</sub>) δ 147.7, 140.5, 138.4, 137.6, 130.4, 130.2, 129.8, 129.2, 129.0, 128.9, 128.8, 128.7, 128.5, 128.0, 127.0, 126.4, 126.1, 125.9, 125.8, 125.3, 124.1, 129.8.

### 2.19

*4-(naphthalen-2-yl)-1,2-diphenyl-1H-imidazole 3s*. 0.2 mmol, 61 mg, 88%; White solid; mp 196-198 °C. <sup>1</sup>H NMR (300 MHz, CDCl<sub>3</sub>) δ 7.97 (d, *J* = 8.2 Hz, 2H), 7.65 (d, *J* = 8.2 Hz, 4H), 7.50 – 7.38 (m, 8H), 7.34 (d, *J* = 7.4 Hz, 1H), 7.32 – 7.20 (m, 6H). <sup>13</sup>C NMR (75 MHz, CDCl<sub>3</sub>) δ 146.8, 141.1, 138.0, 133.4, 132.3, 130.6, 129.7, 129.1, 128.4, 128.1, 127.8, 127.7, 127.2, 125.7, 125.4, 125.0, 123.2, 122.8, 118.6, 109.4. HRMS (ESI): *m/z* calcd for C<sub>25</sub>H<sub>19</sub>N<sub>2</sub> (M + H)<sup>+</sup> 347.1543; found, 347.1547.

### 2.20

*4-(6-methoxynaphthalen-2-yl)-1,2-diphenyl-1H-imidazole 3t*. 0.2 mmol, 64 mg, 86%; Yellow solid; mp 186-189 °C. <sup>1</sup>H NMR (300 MHz, CDCl<sub>3</sub>) δ 8.38 (s, 1H), 7.92 (d, *J* = 8.7 Hz, 1H), 7.83 – 7.73 (m, 2H), 7.55 – 7.46 (m, 3H), 7.45 – 7.36 (m, 3H), 7.35 – 7.24 (m, 5H), 7.20 – 7.09 (m, 2H), 3.92 (s, 3H). <sup>13</sup>C NMR (75 MHz, CDCl<sub>3</sub>) δ 157.5, 147.1, 141.7, 138.5, 133.8, 130.2, 129.7, 129.5, 129.3, 129.0, 128.9, 128.5, 128.2, 128.1, 127.0, 125.8, 124.2, 123.2, 118.8, 118.5, 105.8, 55.3. HRMS (ESI): *m/z* calcd for C<sub>26</sub>H<sub>21</sub>N<sub>2</sub>O (M + H)<sup>+</sup> 377.1649; found, 377.1648.

### 2.21

*4-ethyl-1,2-diphenyl-1H-imidazole 3u*. 0.2 mmol, 46 mg, 93%; Yellow oil; <sup>1</sup>H NMR (400 MHz, CDCl<sub>3</sub>) δ 7.41 – 7.35 (m, 5H), 7.27 – 7.18 (m, 6H), 6.89 (s, 1H), 2.78 – 2.70 (m, 2H), 1.35 – 1.25 (m, 3H). <sup>13</sup>C NMR (100 MHz, CDCl<sub>3</sub>) δ 145.8, 144.4, 138.7, 129.4, 128.7, 128.2, 128.1, 127.8, 125.8, 118.3, 21.6, 13.5. HRMS (ESI): *m/z* calcd for C<sub>17</sub>H<sub>17</sub>N<sub>2</sub> (M + H)<sup>+</sup> 249.1386; found, 249.1383.

### 2.22

*4-isobutyl-1,2-diphenyl-1H-imidazole 3v*. 0.2 mmol, 53 mg, 95%; Yellow oil; <sup>1</sup>H NMR (400 MHz, CDCl<sub>3</sub>) δ 7.41 – 7.36 (m, 5H), 7.35 – 7.17 (m, 6H), 6.89 (s, 1H), 2.56 – 2.52 (d, *J* = 6.8 Hz, 2H), 2.16 – 2.00 (m, 3H). <sup>13</sup>C NMR (100 MHz, CDCl<sub>3</sub>) δ 145.7, 141.8, 138.7, 129.3, 128.7, 128.2, 128.1, 127.8, 125.8, 119.5, 37.6, 28.4, 22.6. HRMS (ESI): *m/z* calcd for C<sub>19</sub>H<sub>21</sub>N<sub>2</sub> (M + H)<sup>+</sup> 277.1699; found, 277.1698.
